# Supplementary material for: One-pot, two-step conversion of alkynes to α-amino (α,α-diamino) ketones with a DMF-activated N-bromoimide strategy
Source: Royal Society of Chemistry journal article supplement (doi:10.1039/c6ra12770c), 2016-01-01

## *Supporting Information*

### **One-pot, two-step conversion of alkynes to $\alpha$ -amino ( $\alpha,\alpha$ -diamino) Ketones with a DMF-activated N-bromoimides strategy**

Mengru Li,<sup>a</sup> Luyan Zhang,<sup>a</sup> Baozhong Zhao<sup>a</sup> and Fushun Liang,<sup>\*,a,b</sup>

<sup>a</sup> Department of Chemistry, Northeast Normal University, Changchun 130024, China. E-mail: liangfs112@nenu.edu.cn; Fax: +86-431-85099759;

<sup>b</sup> College of Chemistry, Liaoning University, Shenyang 110036, China.

liangfs112@nenu.edu.cn

## **Table of contents**

|                                                                                           |            |
|-------------------------------------------------------------------------------------------|------------|
| <b>I. General .....</b>                                                                   | <b>S2</b>  |
| <b>II. Synthesis and analytical data of 2-7.....</b>                                      | <b>S2</b>  |
| <b>III. Copies of <sup>1</sup>H and <sup>13</sup>C NMR spectra for compounds 2-7.....</b> | <b>S10</b> |

## I. General

All reagents were purchased from commercial sources and used without treatment, unless otherwise indicated. The products were purified by column chromatography over silica gel.  $^1\text{H}$  NMR and  $^{13}\text{C}$  NMR spectra were recorded at 25 °C on a Varian 500 MHz and 125 MHz, respectively, and TMS as internal standard. High resolution mass spectra (HRMS) were recorded on Bruck microTof by using ESI method.

## II. Synthesis and analytical data of 2-7

### 1. Reactions of Alkynes with NBS

General procedure for the preparation of **2** (**2a** as an example): To a solution of phenylacetylene **1a** (0.110 mL, 1.0 mmol) in DMF (2.0 mL) was added NBS (391.6 mg, 2.2 mmol) and  $\text{H}_2\text{O}$  (27  $\mu\text{L}$ , 1.5 mmol). The mixture was stirred at room temperature for 1 h. Finally DBU (0.159 mL, 2.2 mmol) was added at room temperature for 5 min. The reaction mixture was poured into water and then extracted with  $\text{CH}_2\text{Cl}_2$  (3  $\times$  10 mL). The combined organic phase was washed with water (3  $\times$  10 mL), filtered and concentrated under reduced pressure. The crude product was purified by flash chromatography (silica gel, petroleum ether as eluent) to give **2a** (193 mg, 89%) as a white solid.

### 2. Reactions of Alkynes with NBP

**Table S1.** Optimization of conditions for the Reactions of Alkynes with NBP<sup>a,b</sup>.

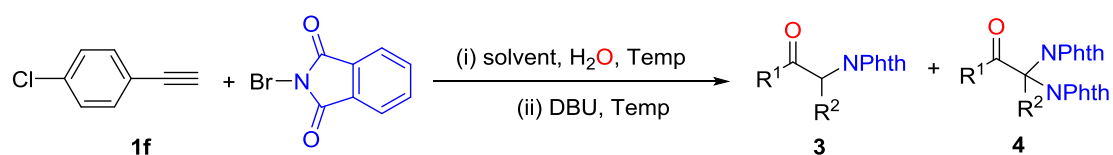

| Step 1 |         |                                 |            | Step 2       |              |           |                        |                |
|--------|---------|---------------------------------|------------|--------------|--------------|-----------|------------------------|----------------|
| entry  | solvent | $\text{H}_2\text{O}$<br>(equiv) | $t$<br>(h) | base (equiv) | temp<br>(°C) | $t$ (min) | yield (%) <sup>b</sup> |                |
| 1      | DMF     | 1.5                             | 1          | DBU (2.2)    | rt           | 5         | <b>3</b><br>21         | <b>4</b><br>69 |
| 2      | DMF     | 3.0                             | 2          | DBU (2.2)    | rt           | 30        | 20                     | 64             |

|                |     |     |   |                                      |    |    |    |    |
|----------------|-----|-----|---|--------------------------------------|----|----|----|----|
| 3              | DMF | 1.1 | 1 | DBU (2.2)                            | rt | 5  | 16 | 58 |
| 4              | DMF | 1.5 | 1 | DBU (2.2)                            | 80 | 30 | 19 | 68 |
| 5 <sup>c</sup> | DMF | 1.5 | 6 | DBU (3.0)                            | rt | 5  | 18 | 69 |
| 6              | NMP | 1.5 | 3 | DBU (2.2)                            | 5  | 60 | 11 | 35 |
| 7              | DMF | 1.5 | 1 | TMG (2.2)                            | 5  | 5  | 15 | 56 |
| 8              | DMF | 1.5 | 1 | NaOH (2.2)                           | 5  | 5  | 17 | 61 |
| 9              | DMF | 1.5 | 1 | K <sub>2</sub> CO <sub>3</sub> (2.2) | 30 | 5  | 18 | 62 |

<sup>a</sup>Reactions were carried out with **1f** (1.0 mmol), NBP (2.2 equiv), H<sub>2</sub>O, base in solvent (2.0 mL) at room temperature. <sup>b</sup> Isolated yield. <sup>c</sup> NBP (3.0 equiv).

## Synthesis and analytical data of 2-7

### 1-(2-oxo-2-phenylethyl)pyrrolidine-2,5-dione (**2a**)

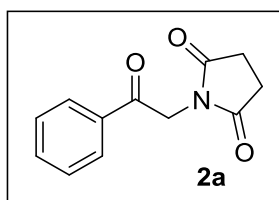

White solid. m.p. 157-158 °C. <sup>1</sup>H NMR (500 MHz, CDCl<sub>3</sub>): δ = 2.85 (s, 4H), 4.94 (s, 2H), 7.49 (t, *J* = 8.0 Hz, 2H), 7.61 (t, *J* = 7.5 Hz, 1H), 7.95 (d, *J* = 7.5 Hz, 2H); <sup>13</sup>C NMR (CDCl<sub>3</sub>, 125 MHz): δ = 28.3, 44.7, 128.0, 128.8, 134.0, 134.2, 176.7, 190.2; HRMS (ESI) *m/z* calcd for C<sub>12</sub>H<sub>11</sub>NO<sub>3</sub> [M+H]<sup>+</sup>: 218.0817; found: 218.0811.

### 1-(2-(4-methoxyphenyl)-2-oxoethyl)pyrrolidine-2,5-dione (**2b**)

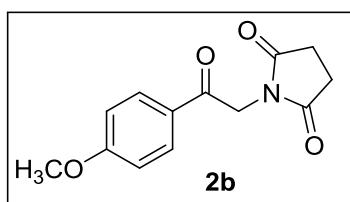

White solid. m.p. 109-110 °C. <sup>1</sup>H NMR (500 MHz, CDCl<sub>3</sub>): δ = 2.86 (s, 4H), 3.88 (s, 3H), 4.90 (s, 2H), 6.96 (d, *J* = 8.0 Hz, 2H), 7.94 (d, *J* = 8.5 Hz, 2H); <sup>13</sup>C NMR (CDCl<sub>3</sub>, 125 MHz): δ = 28.3, 44.4, 55.5, 114.0, 127.3, 130.4, 164.1, 176.7, 188.5; HRMS (ESI) *m/z* calcd for C<sub>13</sub>H<sub>13</sub>NO<sub>4</sub> [M+H]<sup>+</sup>: 248.0923; found: 248.0928.

### 1-(2-oxo-2-(p-tolyl)ethyl)pyrrolidine-2,5-dione (**2c**)

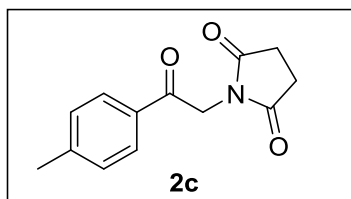

White solid. m.p. 172-173 °C. <sup>1</sup>H NMR (500 MHz, CDCl<sub>3</sub>): δ = 2.43 (s, 3H), 2.86 (s, 4H), 4.92 (s, 2H), 7.29 (d, *J* = 8.0 Hz, 2H), 7.86 (d, *J* = 7.5 Hz, 2H); <sup>13</sup>C NMR (CDCl<sub>3</sub>, 125 MHz): δ = 21.7, 28.3, 44.6, 128.1, 129.5, 131.7, 145.0, 176.7, 189.7; HRMS (ESI) *m/z* calcd for C<sub>13</sub>H<sub>13</sub>NO<sub>3</sub> [M+H]<sup>+</sup>: 232.0974; found: 232.0969.

**1-(2-oxo-2-(*m*-tolyl)ethyl)pyrrolidine-2,5-dione (2d)**

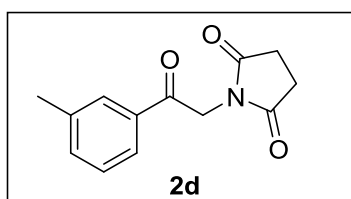

White solid. m.p. 170-171 °C. <sup>1</sup>H NMR (500 MHz, CDCl<sub>3</sub>): δ = 2.42 (s, 3H), 2.86 (s, 4H), 4.93 (s, 2H), 7.37-7.44 (m, 2H), 7.76 (d, *J* = 8.5 Hz 2H); <sup>13</sup>C NMR (CDCl<sub>3</sub>, 125 MHz): δ = 21.3, 28.3, 44.7, 125.2, 128.6, 128.7, 134.3, 134.8, 138.7, 176.7, 190.3; HRMS (ESI) *m/z* calcd for C<sub>13</sub>H<sub>13</sub>NO<sub>3</sub> [M+H]<sup>+</sup>: 232.0974; found: 232.0979.

**1-(2-(4-(*tert*-butyl)phenyl)-2-oxoethyl)pyrrolidine-2,5-dione (2e)**

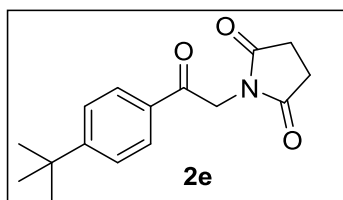

White solid. m.p. 132-133 °C. <sup>1</sup>H NMR (500 MHz, CDCl<sub>3</sub>): δ = 1.35 (s, 9H), 2.86 (s, 4H), 4.94 (s, 2H), 7.51 (d, *J* = 8.0 Hz, 2H), 7.91 (d, *J* = 8.0 Hz, 2H); <sup>13</sup>C NMR (CDCl<sub>3</sub>, 125 MHz): δ = 28.3, 31.0, 35.2, 44.6, 125.8, 128.0, 131.7, 158.0, 176.7, 189.8; HRMS (ESI) *m/z* calcd for C<sub>16</sub>H<sub>19</sub>NO<sub>3</sub> [M+H]<sup>+</sup>: 274.1443; found: 274.1439.

**1-(2-(4-chlorophenyl)-2-oxoethyl)pyrrolidine-2,5-dione (2f)**

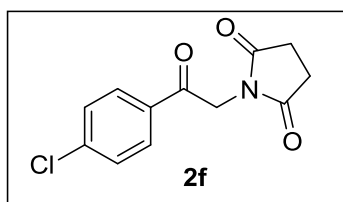

White solid. m.p. 147-148 °C.  $^1\text{H}$  NMR (500 MHz,  $\text{CDCl}_3$ ):  $\delta$  = 2.87 (s, 4H), 4.91 (s, 2H), 7.48 (d,  $J$  = 8.5 Hz, 2H), 7.91 (d,  $J$  = 8.0 Hz, 2H);  $^{13}\text{C}$  NMR ( $\text{CDCl}_3$ , 125 MHz):  $\delta$  = 28.3, 44.6, 129.2, 129.4, 132.6, 140.6, 176.6, 189.1; HRMS (ESI)  $m/z$  calcd for  $\text{C}_{12}\text{H}_{10}\text{ClNO}_3$   $[\text{M}+\text{H}]^+$ : 252.0427; found: 252.0421.

#### 1-(2-(2-chlorophenyl)-2-oxoethyl)pyrrolidine-2,5-dione (2g)

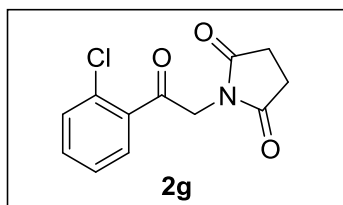

White solid. m.p. 113-114 °C.  $^1\text{H}$  NMR (500 MHz,  $\text{CDCl}_3$ ):  $\delta$  = 2.86 (s, 4H), 4.91 (s, 2H), 7.37-7.40 (m, 1H), 7.47 (d,  $J$  = 9.0 Hz, 2H), 7.70 (d,  $J$  = 7.5 Hz, 2H);  $^{13}\text{C}$  NMR ( $\text{CDCl}_3$ , 125 MHz):  $\delta$  = 28.3, 47.6, 127.1, 130.3, 130.9, 132.0, 133.1, 135.5, 176.5, 192.7; HRMS (ESI)  $m/z$  calcd for  $\text{C}_{12}\text{H}_{10}\text{ClNO}_3$   $[\text{M}+\text{H}]^+$ : 252.0427; found: 252.0431.

#### 1-(2-(4-fluorophenyl)-2-oxoethyl)pyrrolidine-2,5-dione (2h)

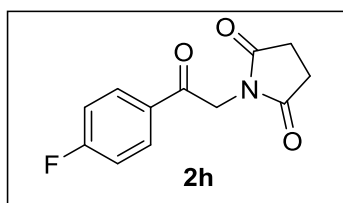

White solid. m.p. 149-150 °C.  $^1\text{H}$  NMR (500 MHz,  $\text{CDCl}_3$ ):  $\delta$  = 2.87 (s, 4H), 4.92 (s, 2H), 7.17-7.20 (m, 2H), 7.99-8.02 (m, 2H);  $^{13}\text{C}$  NMR ( $\text{CDCl}_3$ , 125 MHz):  $\delta$  = 28.3, 44.5, 116.0, 116.2, 130.7, 130.8, 165.2, 167.2, 176.6, 188.7; HRMS (ESI)  $m/z$  calcd for  $\text{C}_{12}\text{H}_{10}\text{FNO}_3$   $[\text{M}+\text{H}]^+$ : 236.0723; found: 236.0729.

#### 1-(2-oxo-2-(thiophen-2-yl)ethyl)pyrrolidine-2,5-dione (2i)

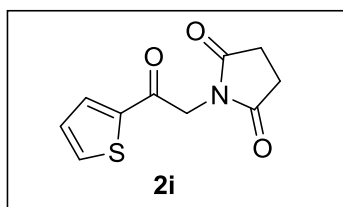

White solid. m.p. 165-166 °C.  $^1\text{H}$  NMR (500 MHz,  $\text{CDCl}_3$ ):  $\delta$  = 2.86 (s, 4H), 4.89 (s, 2H), 7.18 (t,  $J$  = 4.5 Hz, 1H), 7.73 (d,  $J$  = 5.0 Hz, 1H), 7.82 (d,  $J$  = 4.0 Hz, 1H);  $^{13}\text{C}$  NMR ( $\text{CDCl}_3$ , 125 MHz):  $\delta$  = 28.3, 44.6, 128.3, 132.5, 134.7, 140.5, 176.5, 183.2; HRMS (ESI)  $m/z$  calcd for  $\text{C}_{10}\text{H}_9\text{NO}_3\text{S}$   $[\text{M}+\text{H}]^+$ : 224.0381; found: 224.0387.

### 1-(2-oxo-1,2-diphenylethyl)pyrrolidine-2,5-dione (2k)

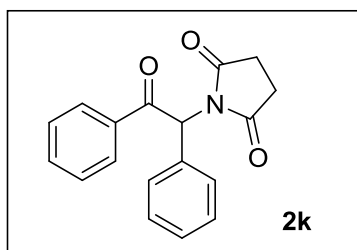

White solid. m.p. 112-113 °C. <sup>1</sup>H NMR (500 MHz, CDCl<sub>3</sub>): δ = 2.72 (s, 4H), 6.61 (s, 1H), 7.31-7.33 (m, 3H), 7.37 (t, *J* = 7.5 Hz, 2H), 7.42-7.44 (m, 2H), 7.50 (t, *J* = 7.5 Hz, 1H), 7.78 (d, *J* = 7.5 Hz, 2H); <sup>13</sup>C NMR (CDCl<sub>3</sub>, 125 MHz): δ = 28.1, 60.8, 128.55, 128.58, 128.68, 128.70, 130.5, 133.2, 133.9, 134.8, 176.2, 192.6; HRMS (ESI) *m/z* calcd for C<sub>18</sub>H<sub>15</sub>NO<sub>3</sub> [M+H]<sup>+</sup>: 294.1130; found: 294.1134.

### 1-(2-oxo-1,2-di-*p*-tolylethyl)pyrrolidine-2,5-dione (2l)

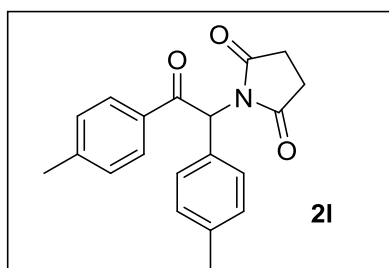

White solid. m.p. 123-124 °C. <sup>1</sup>H NMR (500 MHz, CDCl<sub>3</sub>): δ = 2.30 (s, 3H), 2.35 (s, 3H), 2.70 (s, 4H), 6.58 (s, 1H), 7.11 (d, *J* = 8.0 Hz, 2H), 7.15 (d, *J* = 8.0 Hz, 2H), 7.30 (d, *J* = 7.5 Hz, 1H), 7.69 (t, *J* = 8.0 Hz, 1H); <sup>13</sup>C NMR (CDCl<sub>3</sub>, 125 MHz): δ = 21.2, 21.7, 28.1, 60.6, 128.9, 129.20, 129.23, 130.4, 131.1, 132.2, 138.5, 144.1, 176.3, 192.1; HRMS (ESI) *m/z* calcd for C<sub>20</sub>H<sub>19</sub>NO<sub>3</sub> [M+H]<sup>+</sup>: 322.1443; found: 322.1448.

### 1-(1-(4-nitrophenyl)-2-oxo-2-phenylethyl)pyrrolidine-2,5-dione (2m)

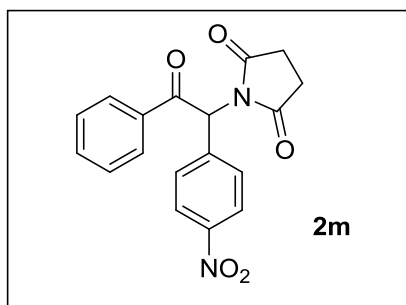

White solid. m.p. 196-197 °C. <sup>1</sup>H NMR (500 MHz, CDCl<sub>3</sub>): δ = 2.74 (s, 4H), 6.62 (s, 1H), 7.41 (t, *J* = 7.5 Hz, 2H), 7.55 (t, *J* = 7.5 Hz, 1H), 7.62 (d, *J* = 8.5 Hz, 2H), 7.75

(d,  $J = 8.0$  Hz, 2H), 8.17 (d,  $J = 7.5$  Hz, 2H);  $^{13}\text{C}$  NMR ( $\text{CDCl}_3$ , 125 MHz):  $\delta = 28.1$ , 59.4, 123.7, 128.3, 128.8, 131.4, 133.7, 134.5, 140.8, 147.8, 175.9, 191.6; HRMS (ESI)  $m/z$  calcd for  $\text{C}_{18}\text{H}_{14}\text{N}_2\text{O}_5$   $[\text{M}+\text{H}]^+$ : 339.0981; found: 339.0976.

### 1-(2-oxo-1-phenylpentyl)pyrrolidine-2,5-dione (2n)

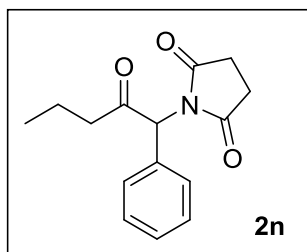

White solid. m.p. 106-107 °C.  $^1\text{H}$  NMR (500 MHz,  $\text{CDCl}_3$ ):  $\delta = 0.98$  (t,  $J = 7.5$  Hz, 3H), 1.32-1.38 (m, 2H), 2.11-2.20 (m, 2H), 2.65-2.69 (m, 4H), 5.40-5.43 (m, 1H), 7.42-7.45 (m, 2H), 7.53-7.56 (m, 1H), 7.74-7.76 (m, 2H);  $^{13}\text{C}$  NMR ( $\text{CDCl}_3$ , 125 MHz):  $\delta = 13.5$ , 19.5, 27.9, 29.4, 56.1, 127.7, 128.6, 133.0, 135.4, 176.6, 195.7; HRMS (ESI)  $m/z$  calcd for  $\text{C}_{15}\text{H}_{17}\text{NO}_3$   $[\text{M}+\text{H}]^+$ : 260.1287; found: 260.1283.

### 2-(2-(4-chlorophenyl)-2-oxoethyl)isoindoline-1,3-dione (3a)

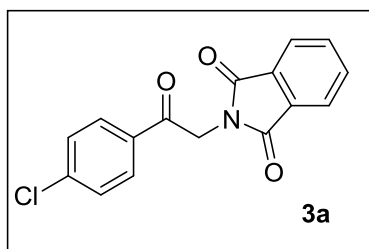

White solid. m.p. 201-202 °C.  $^1\text{H}$  NMR (500 MHz,  $\text{CDCl}_3$ ):  $\delta = 5.09$  (s, 2H), 7.50 (d,  $J = 8.0$  Hz, 2H), 7.76 (dd,  $J = 5.5$ , 3.0 Hz, 2H), 7.91 (dd,  $J = 5.5$ , 3.0 Hz, 2H), 7.95 (d,  $J = 8.0$  Hz, 2H);  $^{13}\text{C}$  NMR ( $\text{CDCl}_3$ , 125 MHz):  $\delta = 44.1$ , 123.6, 129.3, 129.5, 132.2, 132.7, 134.2, 140.6, 167.8, 190.0; HRMS (ESI)  $m/z$  calcd for  $\text{C}_{16}\text{H}_{10}\text{ClNO}_3$   $[\text{M}+\text{H}]^+$ : 300.0427; found: 300.0422.

### 2,2'-(2-(4-chlorophenyl)-2-oxoethane-1,1-diyl)bis(isoindoline-1,3-dione) (4a)

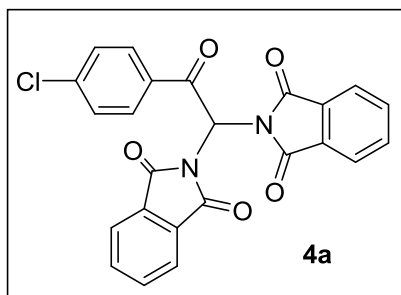

White solid. m.p. 184-185 °C. <sup>1</sup>H NMR (500 MHz, CDCl<sub>3</sub>): δ = 7.36 (s, 1H), 7.42 (d, *J* = 8.0 Hz, 2H), 7.75 (dd, *J* = 5.5, 3.0 Hz, 4H), 7.84-7.90 (m, 6H); δ = 58.8, 124.0, 129.2, 129.4, 131.5, 132.4, 134.6, 140.2, 166.4, 186.4; HRMS (ESI) *m/z* calcd for C<sub>24</sub>H<sub>13</sub>ClN<sub>2</sub>O<sub>5</sub> [M+H]<sup>+</sup>: 445.0591; found: 445.0596.

### 2-(2-(4-fluorophenyl)-2-oxoethyl)isoindoline-1,3-dione (3b)

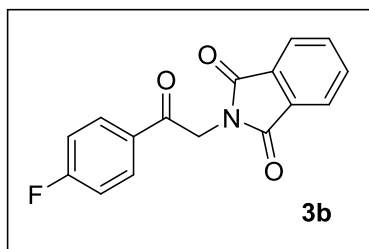

White solid. m.p. 137-138 °C. <sup>1</sup>H NMR (500 MHz, CDCl<sub>3</sub>): δ = 5.10 (s, 2H), 7.20 (t, *J* = 8.5 Hz, 2H), 7.76 (dd, *J* = 5.5, 3.0 Hz, 2H), 7.91 (dd, *J* = 5.5, 3.0 Hz, 2H), 8.05 (dd, *J* = 8.5, 5.0 Hz, 2H); <sup>13</sup>C NMR (CDCl<sub>3</sub>, 125 MHz): δ = 44.0, 116.1, 116.2, 123.6, 130.8, 130.9, 132.2, 134.2, 165.2, 167.3, 167.8, 189.4; HRMS (ESI) *m/z* calcd for C<sub>16</sub>H<sub>10</sub>FNO<sub>3</sub> [M+H]<sup>+</sup>: 284.0723; found: 284.0728.

### 2,2'-(2-(4-fluorophenyl)-2-oxoethane-1,1-diyl)bis(isoindoline-1,3-dione) (4b)

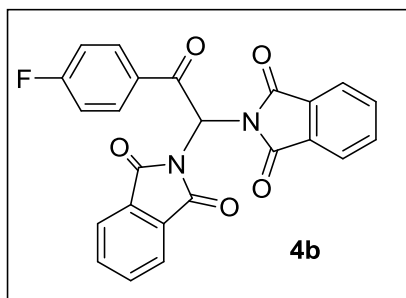

White solid. m.p. 173-174 °C. <sup>1</sup>H NMR (500 MHz, CDCl<sub>3</sub>): δ = 7.12 (t, *J* = 8.5 Hz, 2H), 7.37 (s, 1H), 7.75 (dd, *J* = 5.5, 3.0 Hz, 4H), 7.87 (dd, *J* = 5.5, 3.0 Hz, 4H), 7.97



(dd,  $J = 8.0, 5.0$  Hz, 2H);  $^{13}\text{C}$  NMR ( $\text{CDCl}_3$ , 125 MHz):  $\delta = 58.8, 116.2, 116.4, 124.0, 130.5, 130.6, 131.5, 134.6, 164.9, 166.4, 167.0, 185.9$ ; HRMS (ESI)  $m/z$  calcd for  $\text{C}_{24}\text{H}_{13}\text{FN}_2\text{O}_5$   $[\text{M}+\text{H}]^+$ : 429.0887; found: 429.0880.

### 2-(2-oxo-2-(*m*-tolyl)ethyl)isoindoline-1,3-dione (3c)

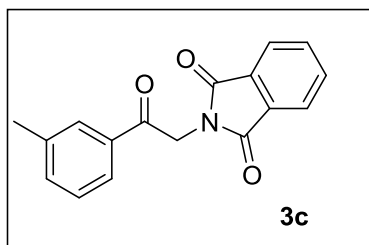

White solid. m.p. 172-173 °C.  $^1\text{H}$  NMR (500 MHz,  $\text{CDCl}_3$ ):  $\delta = 2.44$  (s, 3H), 5.12 (s, 2H), 7.38-7.47 (m, 2H), 7.76 (dd,  $J = 5.5, 3.0$  Hz, 2H), 7.81 (d,  $J = 7.5$  Hz, 2H), 7.91 (dd,  $J = 5.5, 3.0$  Hz, 2H);  $^{13}\text{C}$  NMR ( $\text{CDCl}_3$ , 125 MHz):  $\delta = 21.3, 44.2, 123.5, 125.3, 128.6, 128.7, 132.2, 134.0, 134.4, 134.7, 138.7, 167.9, 191.1$ ; HRMS (ESI)  $m/z$  calcd for  $\text{C}_{17}\text{H}_{13}\text{NO}_3$   $[\text{M}+\text{H}]^+$ : 280.0974; found: 280.0979.

### 2,2'-(2-oxo-2-(*m*-tolyl)ethane-1,1-diyl)bis(isoindoline-1,3-dione) (4c)

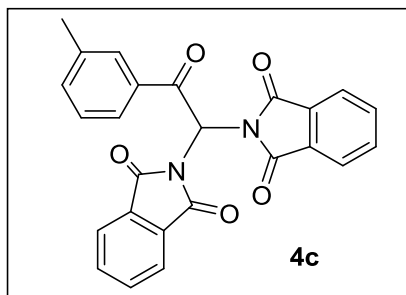

White solid. m.p. 195-196 °C.  $^1\text{H}$  NMR (500 MHz,  $\text{CDCl}_3$ ):  $\delta = 2.37$  (s, 3H), 7.30 (t,  $J = 7.5$  Hz, 1H), 7.36 (d,  $J = 7.5$  Hz, 1H), 7.41 (s, 1H), 7.68 (d,  $J = 7.8$  Hz, 1H), 7.74 (dd,  $J = 5.5, 3.0$  Hz, 4H), 7.79 (s, 1H), 7.87 (dd,  $J = 5.5, 3.0$  Hz, 4H);  $^{13}\text{C}$  NMR ( $\text{CDCl}_3$ , 125 MHz):  $\delta = 21.4, 58.9, 124.0, 124.9, 128.6, 128.8, 131.5, 134.0, 134.5, 134.7, 139.0, 166.5, 187.5$ ; HRMS (ESI)  $m/z$  calcd for  $\text{C}_{25}\text{H}_{16}\text{N}_2\text{O}_5$   $[\text{M}+\text{H}]^+$ : 425.1137; found: 425.1132.

### 2-(2-oxo-2-(thiophen-2-yl)ethyl)isoindoline-1,3-dione (3d)

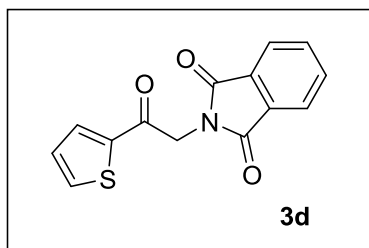

White solid. m.p. 167-168 °C.  $^1\text{H}$  NMR (500 MHz,  $\text{CDCl}_3$ ):  $\delta$  = 5.06 (s, 2H), 7.20 (dd,  $J$  = 5.0, 4.0 Hz, 1H), 7.74 (dd,  $J$  = 5.0, 1.0 Hz, 1H), 7.76 (dd,  $J$  = 5.5, 3.0 Hz, 2H), 7.87 (dd,  $J$  = 4.0, 1.0 Hz, 1H), 7.90 (dd,  $J$  = 5.5, 3.0 Hz, 2H);  $^{13}\text{C}$  NMR ( $\text{CDCl}_3$ , 125 MHz):  $\delta$  = 44.1, 123.6, 128.3, 132.2, 132.4, 134.2, 134.6, 140.6, 167.7, 184.0; HRMS (ESI)  $m/z$  calcd for  $\text{C}_{14}\text{H}_9\text{NO}_3\text{S}$   $[\text{M}+\text{H}]^+$ : 271.0303; found: 271.0309.

#### 2,2'-(2-oxo-2-(*m*-tolyl)ethane-1,1-diyl)bis(isoindoline-1,3-dione) (4d)

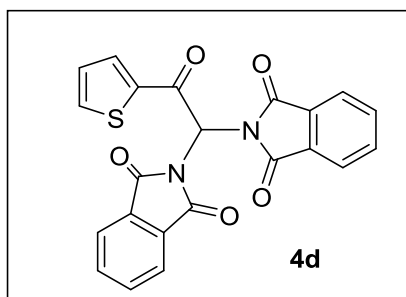

White solid. m.p. 184-185 °C.  $^1\text{H}$  NMR (500 MHz,  $\text{CDCl}_3$ ):  $\delta$  = 7.07 (dd,  $J$  = 5.0, 4.0 Hz, 1H), 7.27 (s, 1H), 7.66 (dd,  $J$  = 5.0, 1.0 Hz, 1H), 7.69 (dd,  $J$  = 4.0, 1.0 Hz, 1H), 7.76 (dd,  $J$  = 5.5, 3.0 Hz, 4H), 7.88 (dd,  $J$  = 5.5, 3.0 Hz, 4H);  $^{13}\text{C}$  NMR ( $\text{CDCl}_3$ , 125 MHz):  $\delta$  = 59.5, 124.0, 128.2, 131.5, 131.9, 134.5, 134.6, 139.4, 166.4, 179.9; HRMS (ESI)  $m/z$  calcd for  $\text{C}_{22}\text{H}_{12}\text{N}_2\text{O}_5\text{S}$   $[\text{M}+\text{H}]^+$ : 417.0545; found: 417.0539.

#### 2-(2-oxo-4-phenylbutyl)isoindoline-1,3-dione (3e)

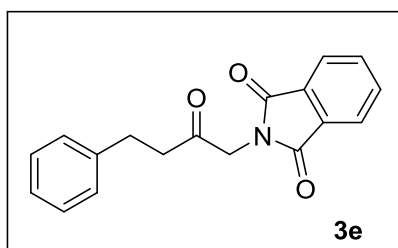

White solid. m.p. 103-104 °C.  $^1\text{H}$  NMR (500 MHz,  $\text{CDCl}_3$ ):  $\delta$  = 2.85 (t,  $J$  = 7.5 Hz, 2H), 2.96 (t,  $J$  = 7.5 Hz, 2H), 4.46 (s, 2H), 7.17-7.23 (m, 3H), 7.30 (t,  $J$  = 7.5 Hz, 2H), 7.74 (dd,  $J$  = 5.5, 3.0 Hz, 2H), 7.87 (dd,  $J$  = 5.5, 3.0 Hz, 2H);  $^{13}\text{C}$  NMR ( $\text{CDCl}_3$ , 125

MHz):  $\delta = 29.4, 41.6, 46.6, 123.6, 126.3, 128.3, 128.6, 132.0, 134.2, 140.3, 167.6, 201.3$ ; HRMS (ESI)  $m/z$  calcd for  $C_{18}H_{15}NO_3$   $[M+H]^+$ : 294.1130; found: 294.1134.

**2,2'-(2-oxo-2-(m-tolyl)ethane-1,1-diyl)bis(isoindoline-1,3-dione) (4e)**

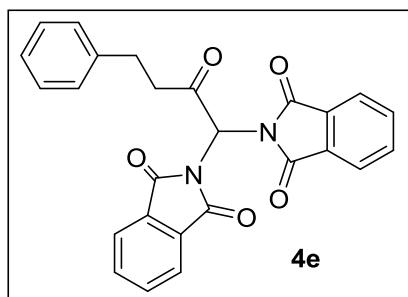

White solid. m.p. 183-184 °C.  $^1H$  NMR (500 MHz,  $CDCl_3$ ):  $\delta = 3.45$  (dd,  $J = 14.5, 11.0$  Hz, 1H), 3.59 (dd,  $J = 14.5, 5.0$  Hz, 1H), 4.58 (d,  $J = 2.0$  Hz, 2H), 5.20 (dd,  $J = 11.0, 5.0$  Hz, 1H), 7.11-7.16 (m, 5H), 7.71-7.74 (m, 4H), 7.79 (dd,  $J = 5.5, 3.0$  Hz, 2H), 7.84 (dd,  $J = 5.5, 3.0$  Hz, 2H);  $^{13}C$  NMR ( $CDCl_3$ , 125 MHz):  $\delta = 33.6, 44.6, 58.4, 123.5, 123.6, 126.9, 128.6, 128.9, 131.3, 134.2, 134.3, 136.0, 167.3, 197.3$ ; HRMS (ESI)  $m/z$  calcd for  $C_{26}H_{18}N_2O_5$   $[M+H]^+$ : 439.1294; found: 439.1298.

**2-(1-(4-nitrophenyl)-2-oxo-2-phenylethyl)isoindoline-1,3-dione (3g)**

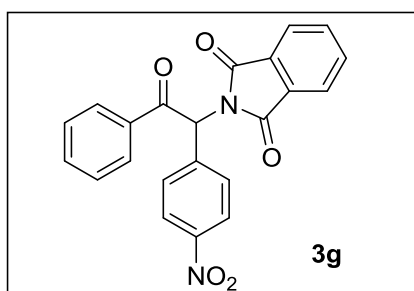

White solid. m.p. 169-170 °C.  $^1H$  NMR (500 MHz,  $CDCl_3$ ):  $\delta = 6.80$  (s, 1H), 7.40 (t,  $J = 7.5$  Hz, 2H), 7.53 (t,  $J = 7.5$  Hz, 1H), 7.68 (d,  $J = 8.5$  Hz, 2H), 7.74 (dd,  $J = 5.5, 3.0$  Hz, 2H), 7.82-7.85 (m, 4H), 8.20-8.22 (m, 2H);  $^{13}C$  NMR ( $CDCl_3$ , 125 MHz):  $\delta = 58.8, 123.7, 123.8, 128.5, 128.9, 131.2, 131.5, 133.7, 134.5, 134.6, 141.5, 147.9, 167.1, 192.0$ ; HRMS (ESI)  $m/z$  calcd for  $C_{22}H_{14}N_2O_5$   $[M+H]^+$ : 387.0981; found: 387.0987.

**2-(2-oxo-1-phenylpentyl)isoindoline-1,3-dione (3h)**

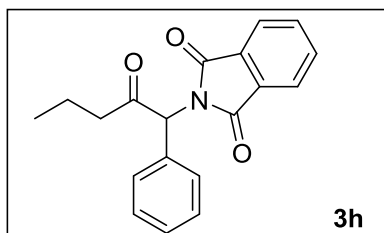

Colorless oil.  $^1\text{H}$  NMR (500 MHz,  $\text{CDCl}_3$ ):  $\delta$  = 0.99 (t,  $J$  = 7.5 Hz, 3H), 1.37-1.46 (m, 2H), 2.15-2.17 (m, 1H), 2.27-2.35 (m, 1H), 5.58-5.61 (m, 1H), 7.40 (dd,  $J$  = 8.5, 7.0 Hz, 2H), 7.46-7.53 (m, 1H), 7.70 (dd,  $J$  = 5.5, 3.0 Hz, 2H), 7.81-7.85 (m, 4H);  $^{13}\text{C}$  NMR ( $\text{CDCl}_3$ , 125 MHz):  $\delta$  = 13.6, 19.6, 30.3, 55.5, 123.5, 128.0, 128.7, 131.6, 133.0, 134.1, 135.5, 167.8, 196.0; HRMS (ESI)  $m/z$  calcd for  $\text{C}_{19}\text{H}_{17}\text{N}_2\text{O}_3$   $[\text{M}+\text{H}]^+$ : 308.1287; found: 308.1282.

### 2-(4-oxohex-2-en-3-yl)isoindoline-1,3-dione (5)

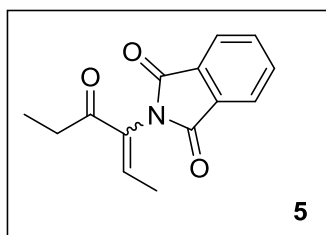

White solid. *E/Z* mixture with the ratio of 1:5.  $^1\text{H}$  NMR (500 MHz,  $\text{CDCl}_3$ ):  $\delta$  = 1.08 (t,  $J$  = 7.5 Hz, 3H, *Z* form), 1.12 (t,  $J$  = 7.5 Hz, 3H, *E* form), 1.80 (d,  $J$  = 7.0 Hz, 3H, *Z* form), 1.94 (d,  $J$  = 7.0 Hz, 3H, *E* form), 2.36 (q,  $J$  = 7.5 Hz, 2H, *Z* form), 2.49 (q,  $J$  = 7.5 Hz, 2H, *E* form), 5.95 (q,  $J$  = 7.5 Hz, 1H, *Z* form), 6.62 (q,  $J$  = 7.5 Hz, 1H, *E* form), 7.82 (dd,  $J$  = 5.5, 3.0 Hz, 2H, *E* form), 7.84 (dd,  $J$  = 5.5, 3.0 Hz, 2H, *Z* form), 7.93 (dd,  $J$  = 5.5, 3.0 Hz, 2H, *E* form), 7.97 (dd,  $J$  = 5.5, 3.0 Hz, 2H, *Z* form).  $^{13}\text{C}$  NMR ( $\text{CDCl}_3$ , 125 MHz):  $\delta$  = 12.7, 13.0, 14.7, 14.9, 19.7, 27.0, 124.1, 124.3, 131.1, 131.4, 131.7, 134.9, 135.3, 139.3, 143.5, 143.6, 164.9, 165.8, 167.8, 168.3; HRMS (ESI)  $m/z$  calcd for  $\text{C}_{14}\text{H}_{13}\text{NO}_3$   $[\text{M}+\text{H}]^+$ : 244.0974; found: 244.0968.

### 2,2'-(4-oxohexane-2,3-diyl)bis(isoindoline-1,3-dione) (6)

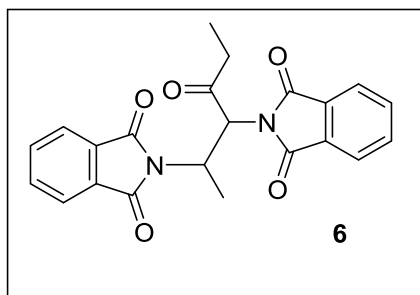

White solid. m.p. 163-165 °C.  $^1\text{H}$  NMR (400 MHz,  $\text{CDCl}_3$ ):  $\delta$  = 0.79 (t,  $J$  = 7.2 Hz, 3H). 1.51 (d,  $J$  = 6.8 Hz, 3H), 1.94-2.02 (m, 1H), 2.24-2.29 (m, 1H), 4.64 (dd,  $J$  = 10.0, 4.4 Hz, 1H), 4.83 (q,  $J$  = 7.1 Hz, 1H), 7.77 (s, 8H).  $^{13}\text{C}$  NMR ( $\text{CDCl}_3$ , 125 MHz):  $\delta$  = 10.1, 14.1, 21.1, 50.66, 50.70, 56.42, 56.46, 123.3, 123.4, 131.4, 131.6, 134.3, 134.4, 167.3, 167.6, 200.5; HRMS (ESI)  $m/z$  calcd for  $\text{C}_{22}\text{H}_{18}\text{N}_2\text{O}_5$   $[\text{M}+\text{H}]^+$ : 391.1294; found: 391.1299.

### 2,2-dibromo-1-(4-chlorophenyl)ethan-1-one (7)

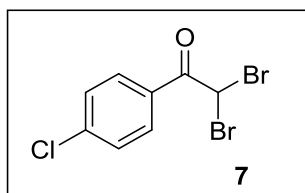

White solid. m.p. 91-92 °C.  $^1\text{H}$  NMR (500 MHz,  $\text{CDCl}_3$ ):  $\delta$  = 6.60 (s, 1H), 7.49 (d,  $J$  = 7.5 Hz, 2H), 8.06 (d,  $J$  = 8.0 Hz, 2H);  $^{13}\text{C}$  NMR ( $\text{CDCl}_3$ , 125 MHz):  $\delta$  = 39.3, 129.0, 129.2, 131.1, 141.0, 184.8; HRMS (ESI)  $m/z$  calcd for  $\text{C}_8\text{H}_5\text{Br}_2\text{ClO}$   $[\text{M}+\text{H}]^+$ : 310.8474; found: 310.8479.

### III. Copies of $^1\text{H}$ and $^{13}\text{C}$ NMR spectra for compounds 2-7

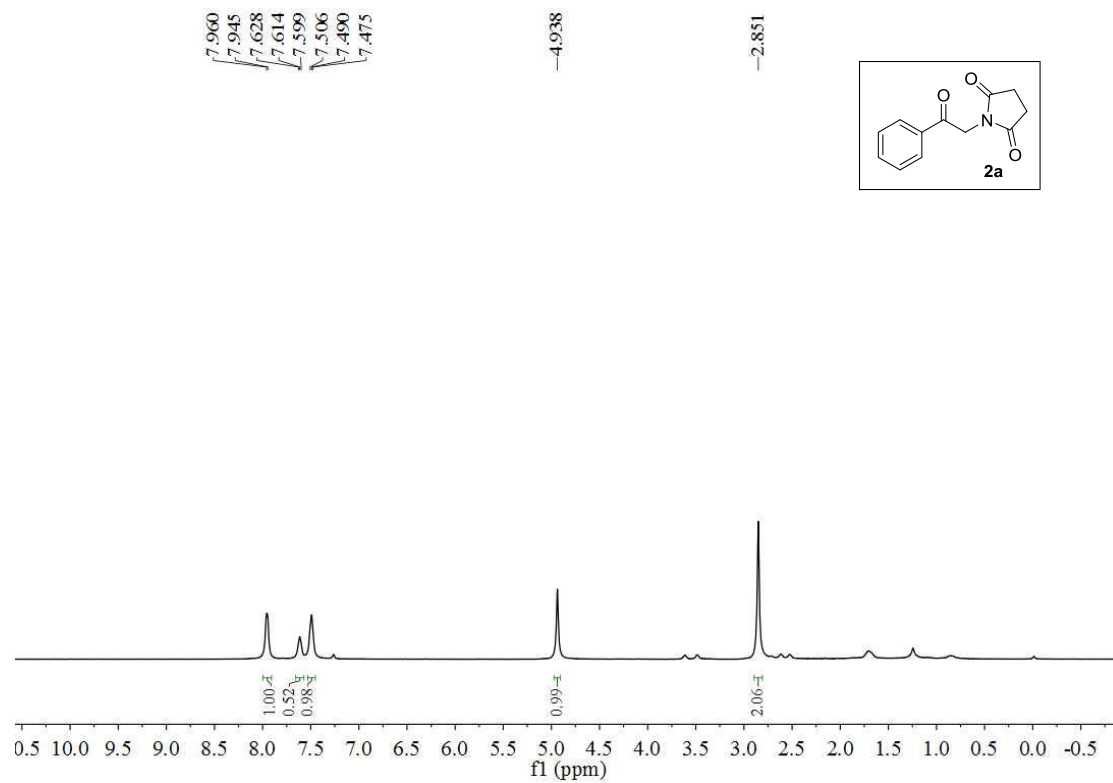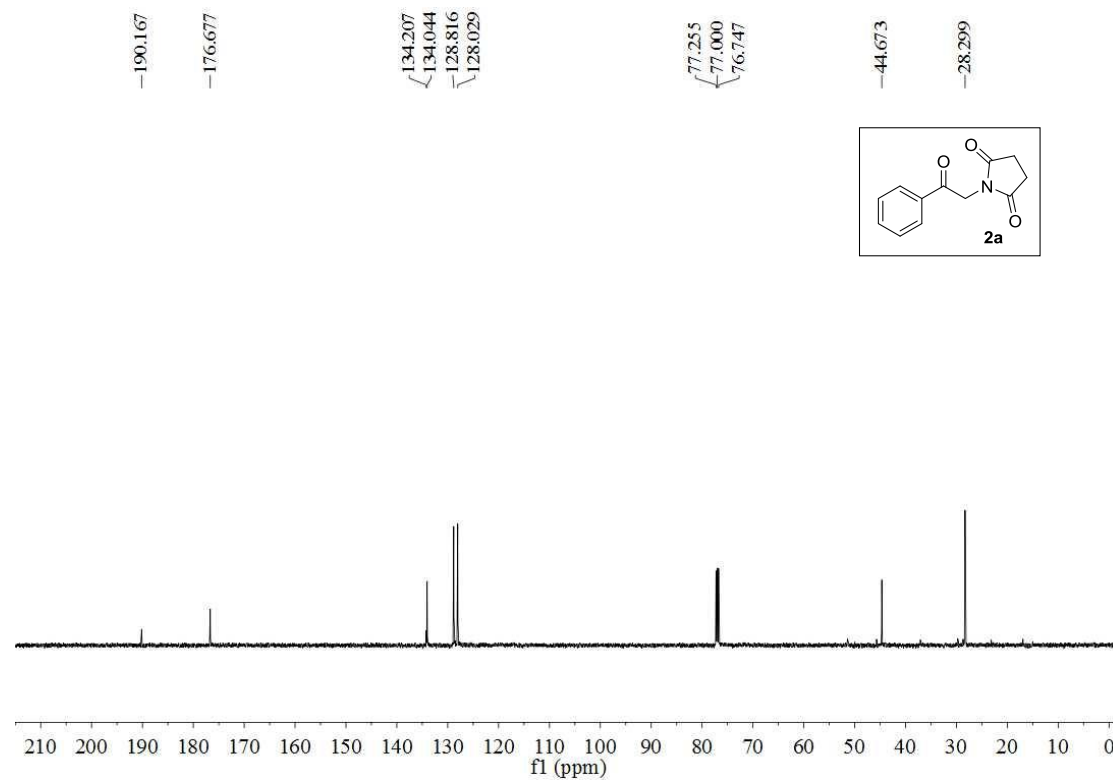

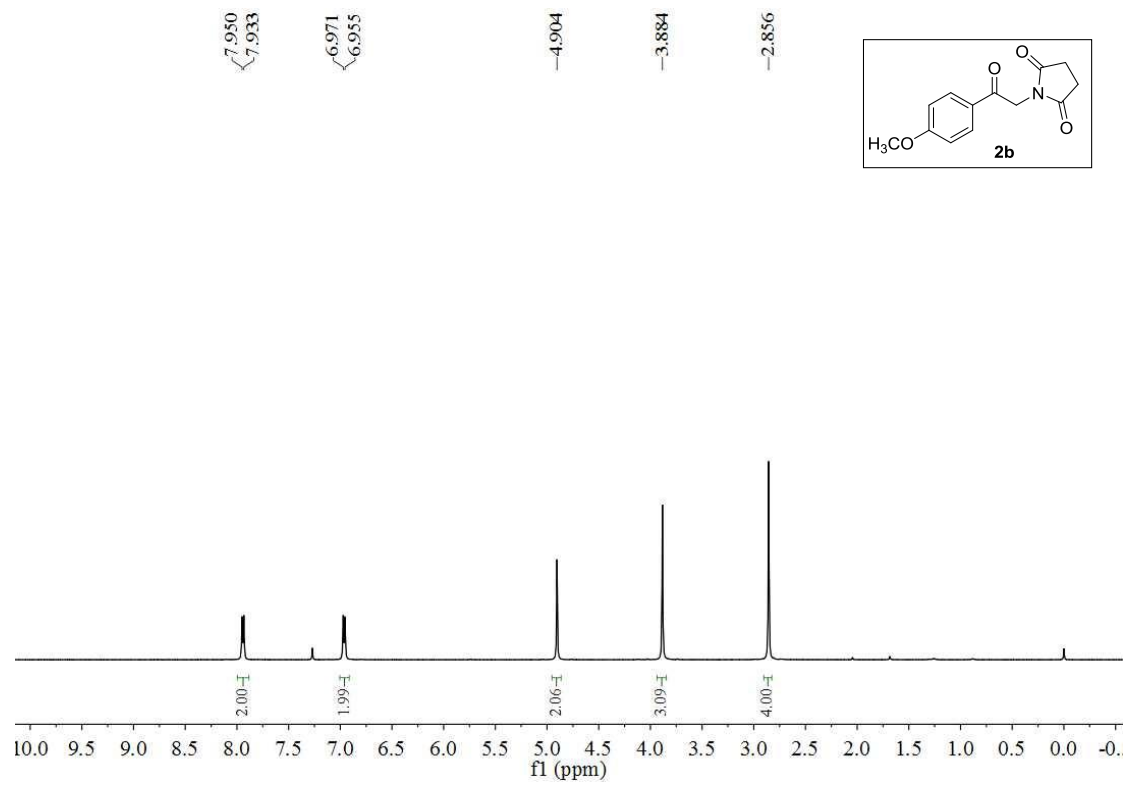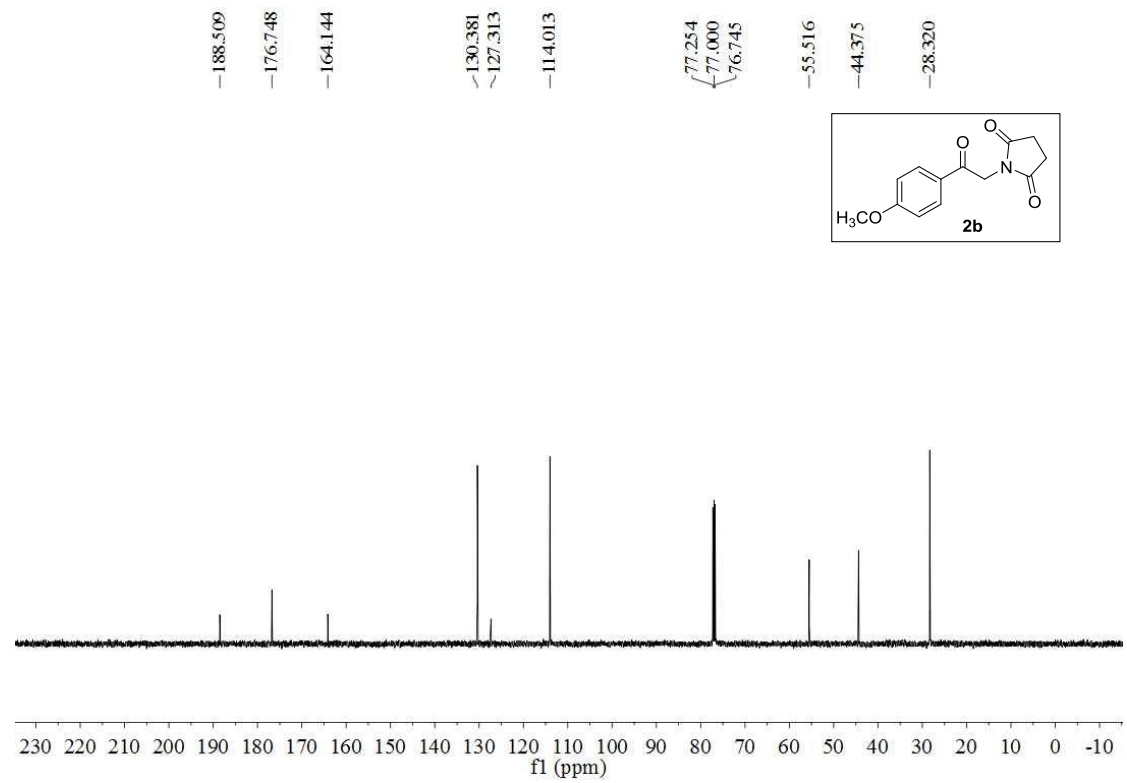

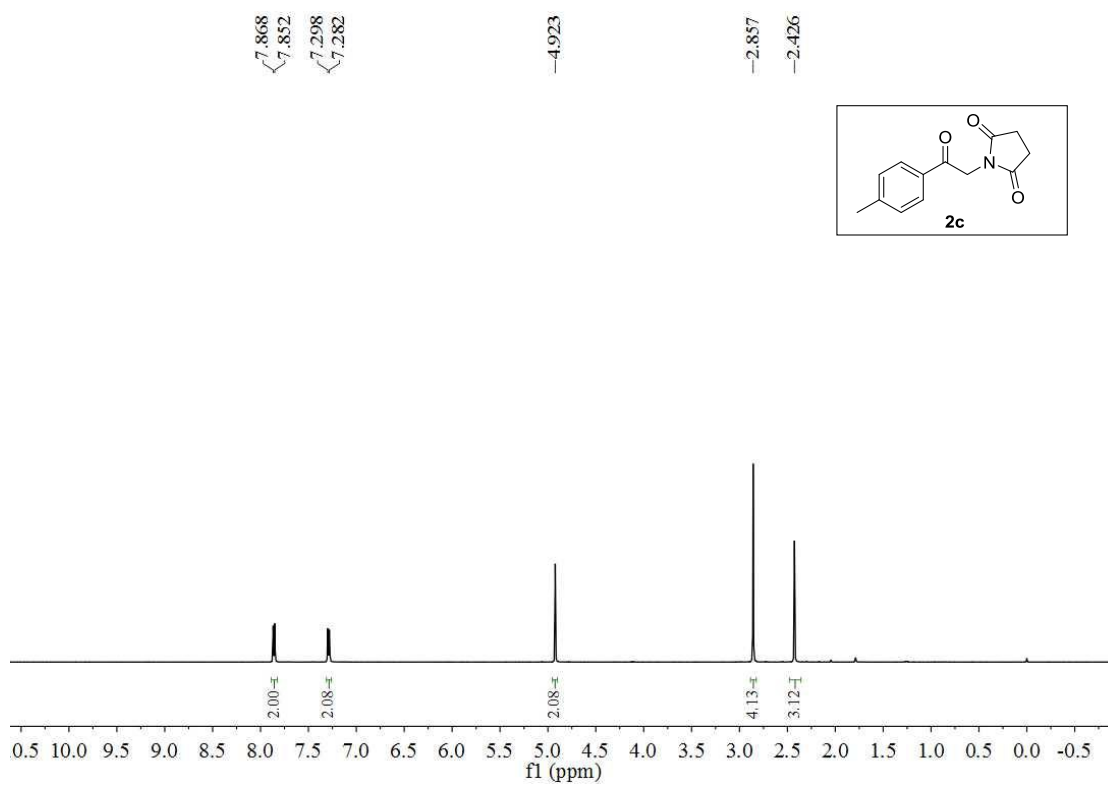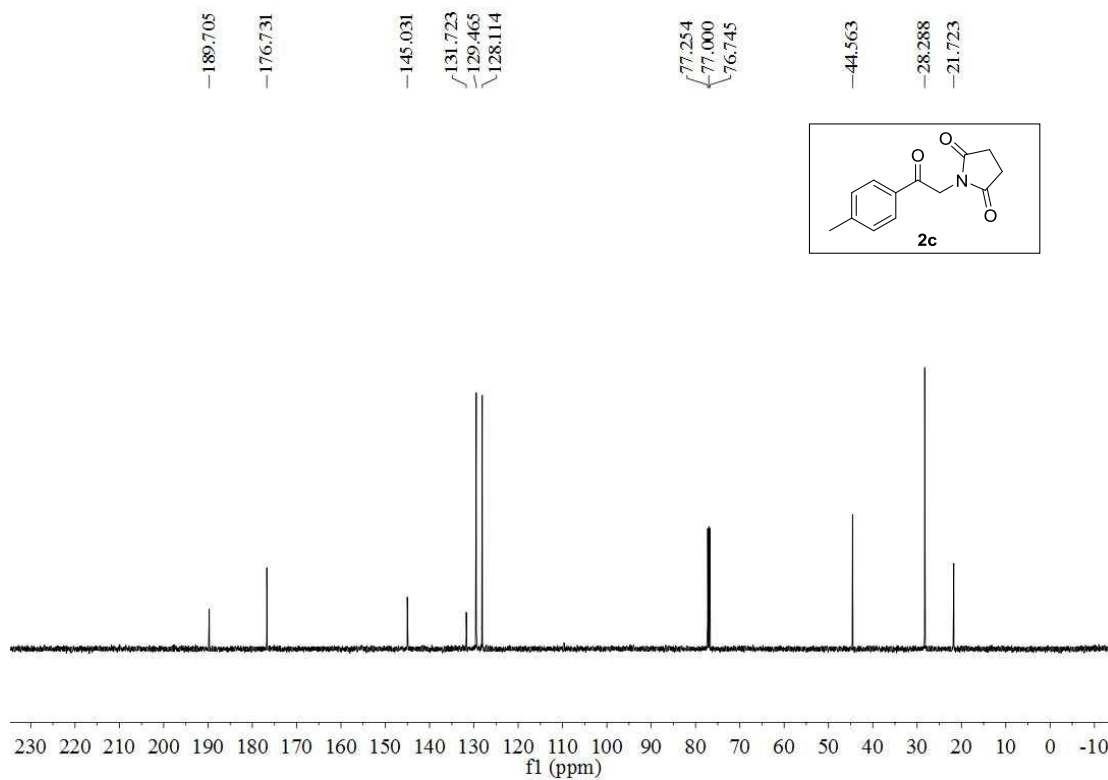



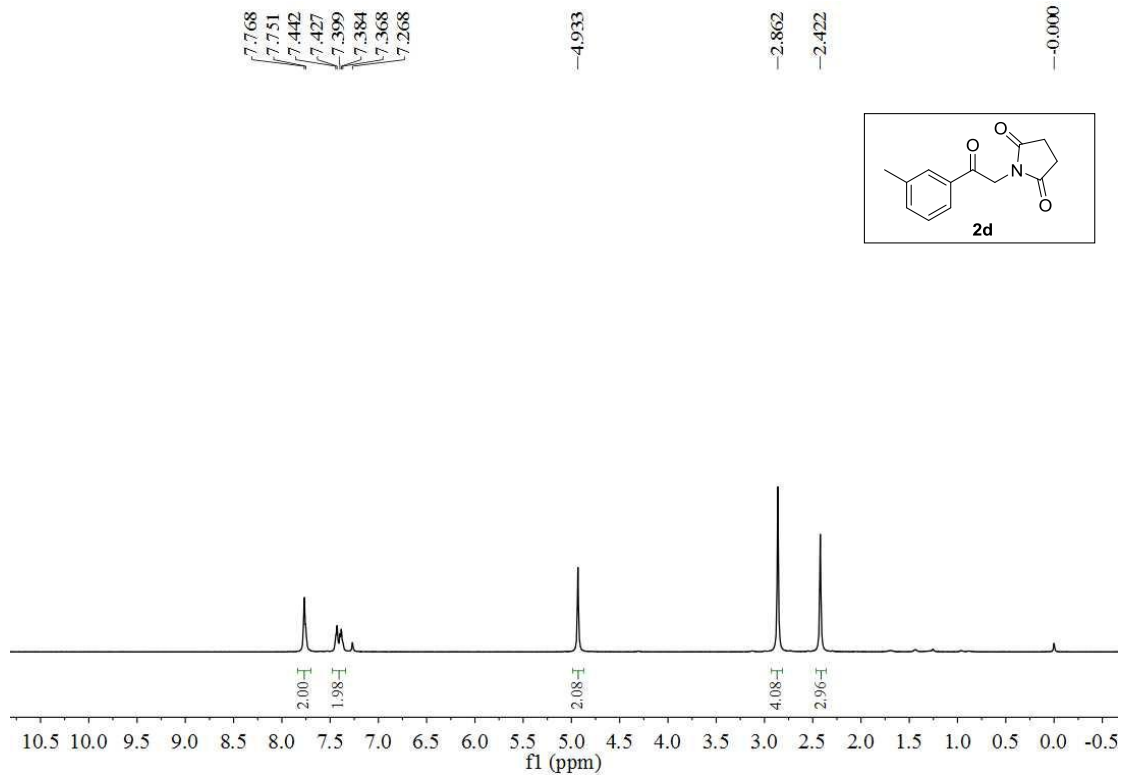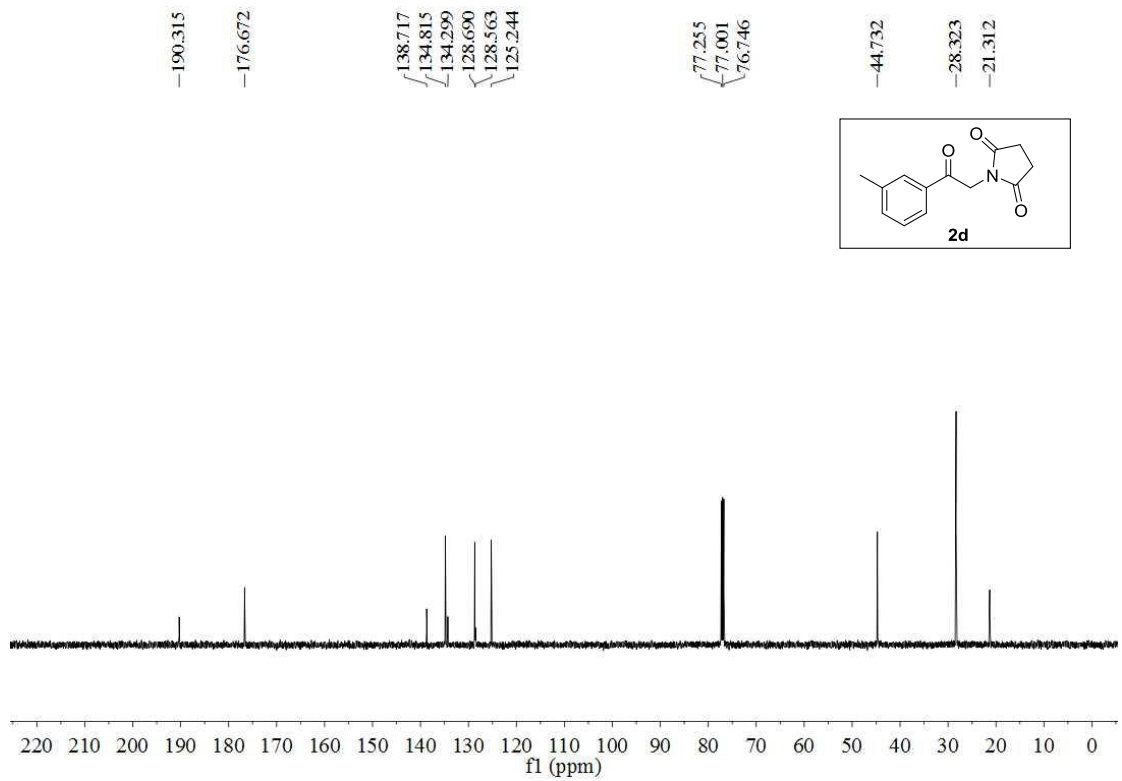

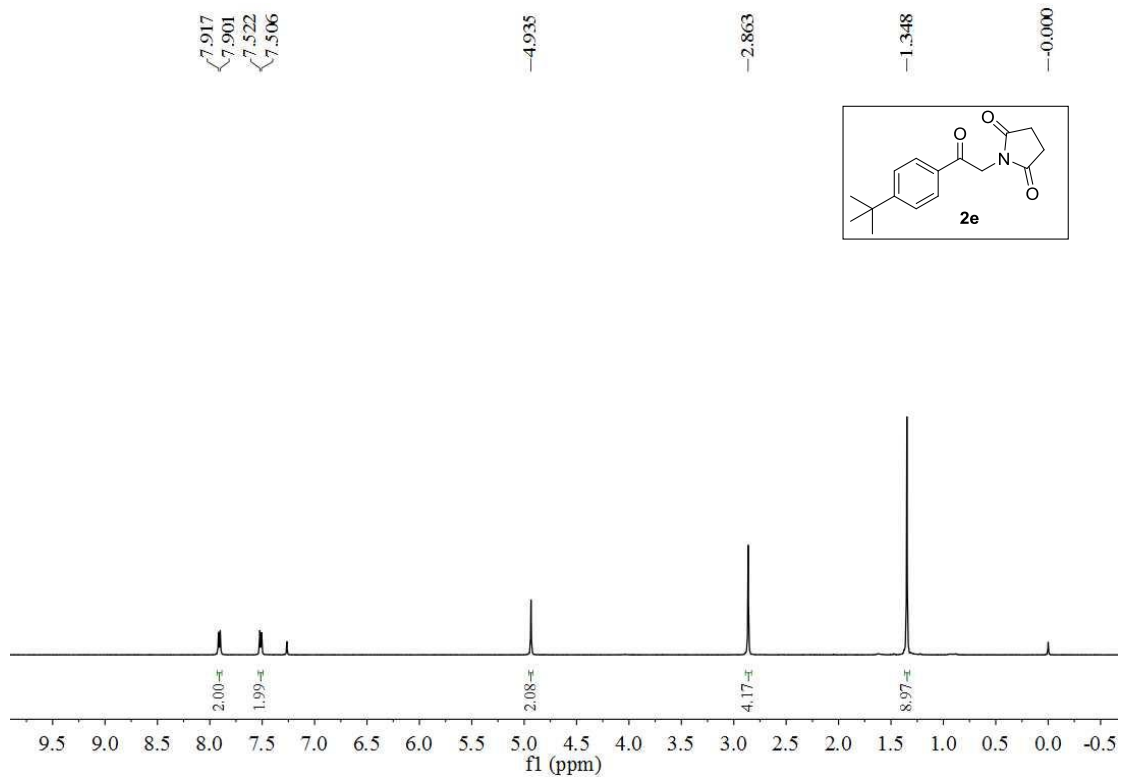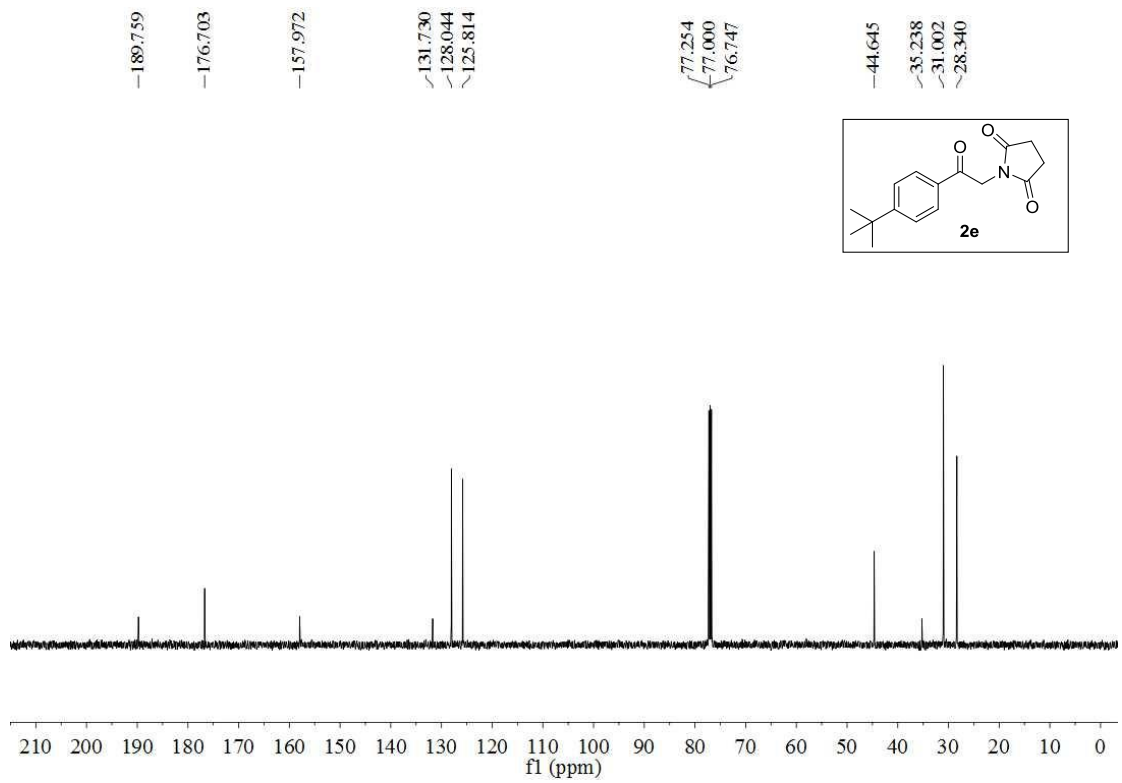

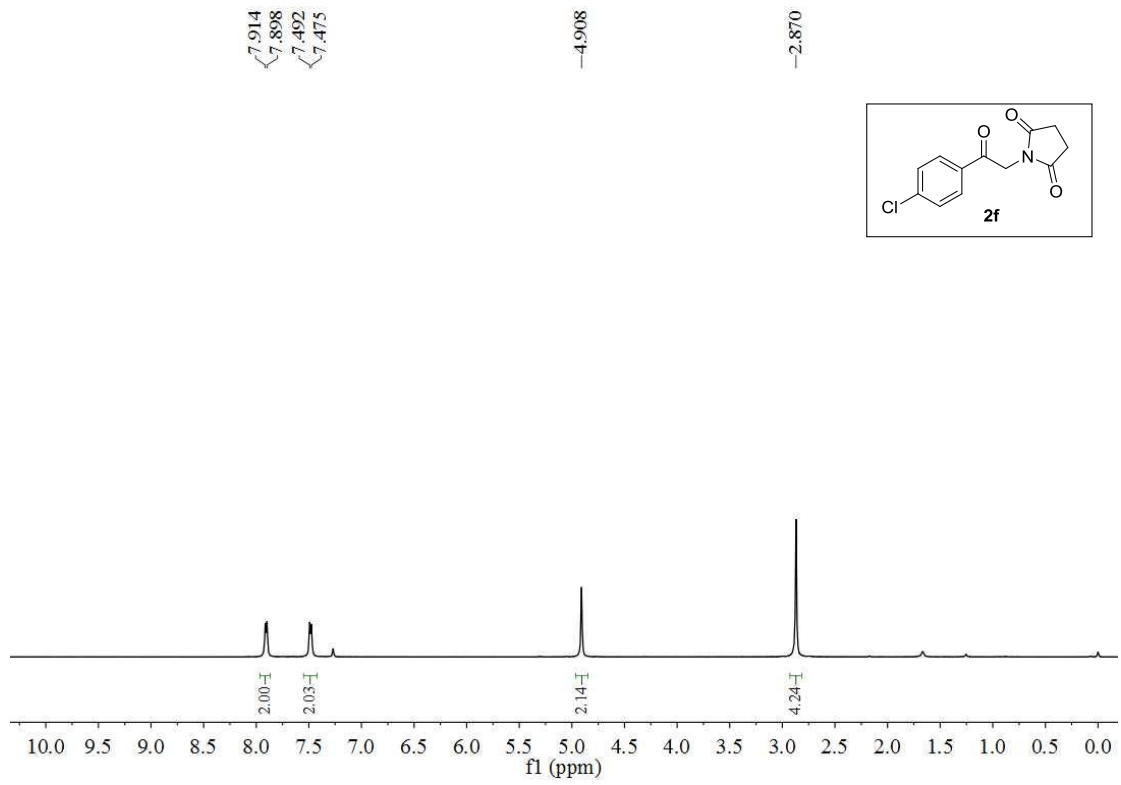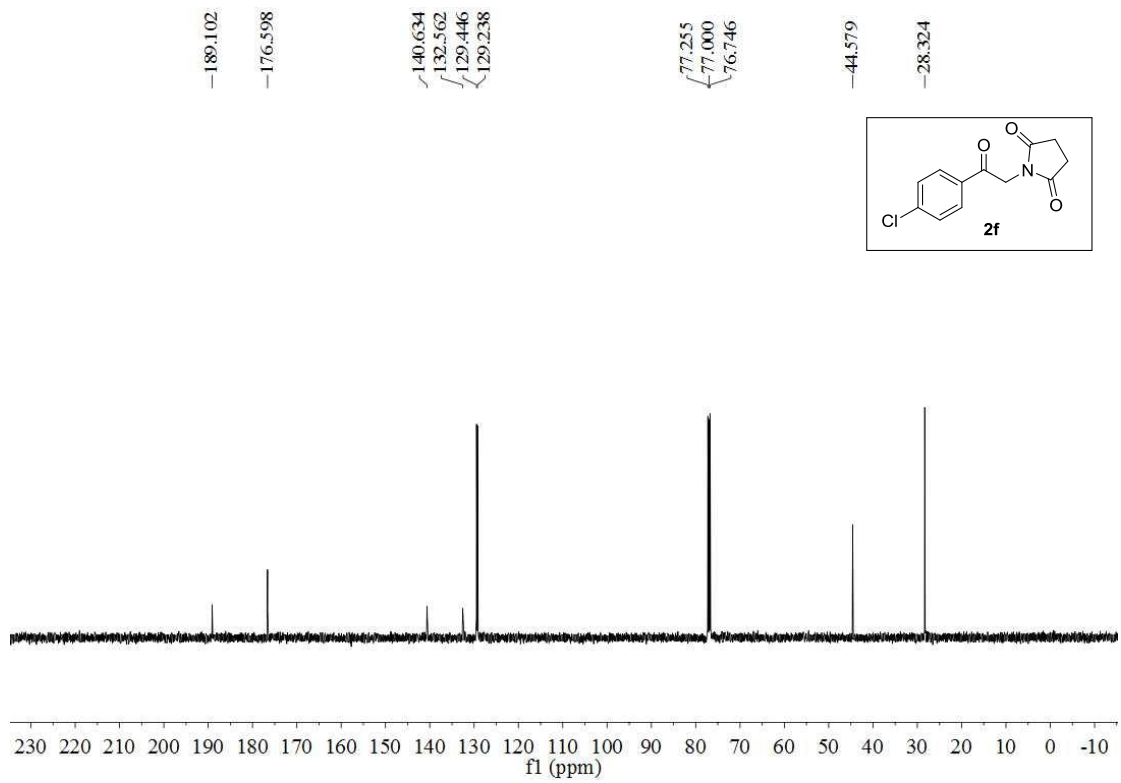

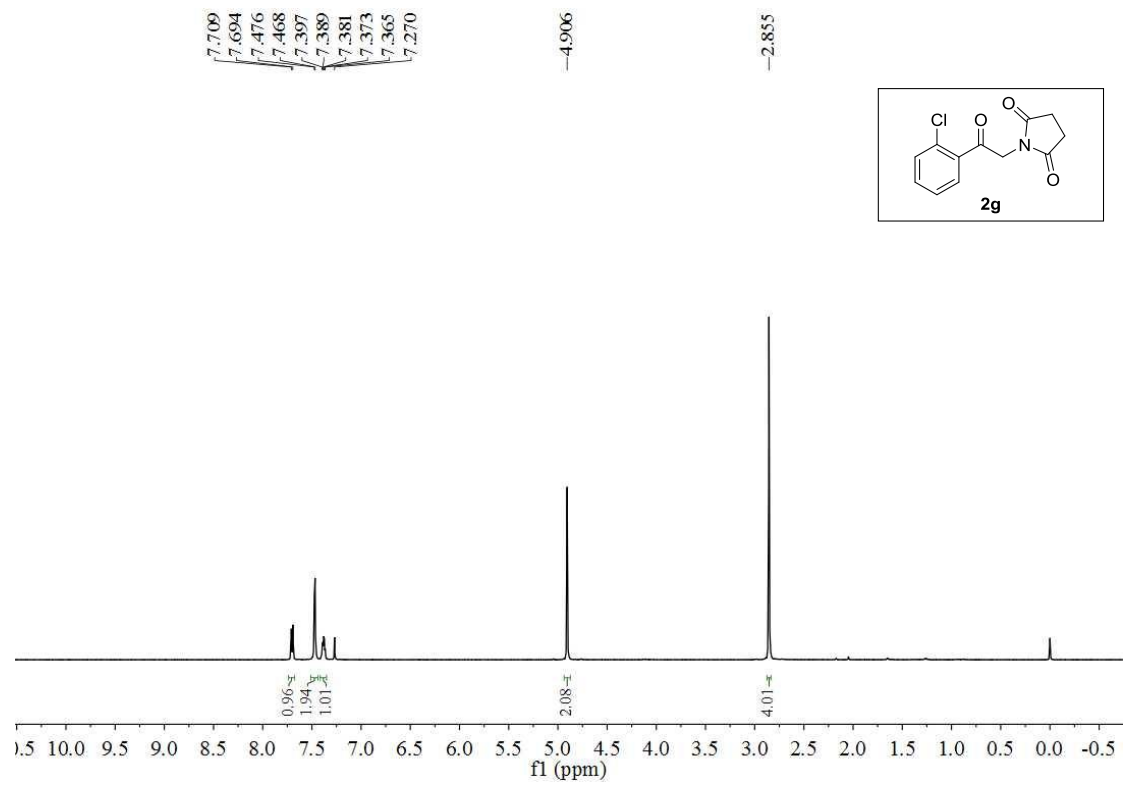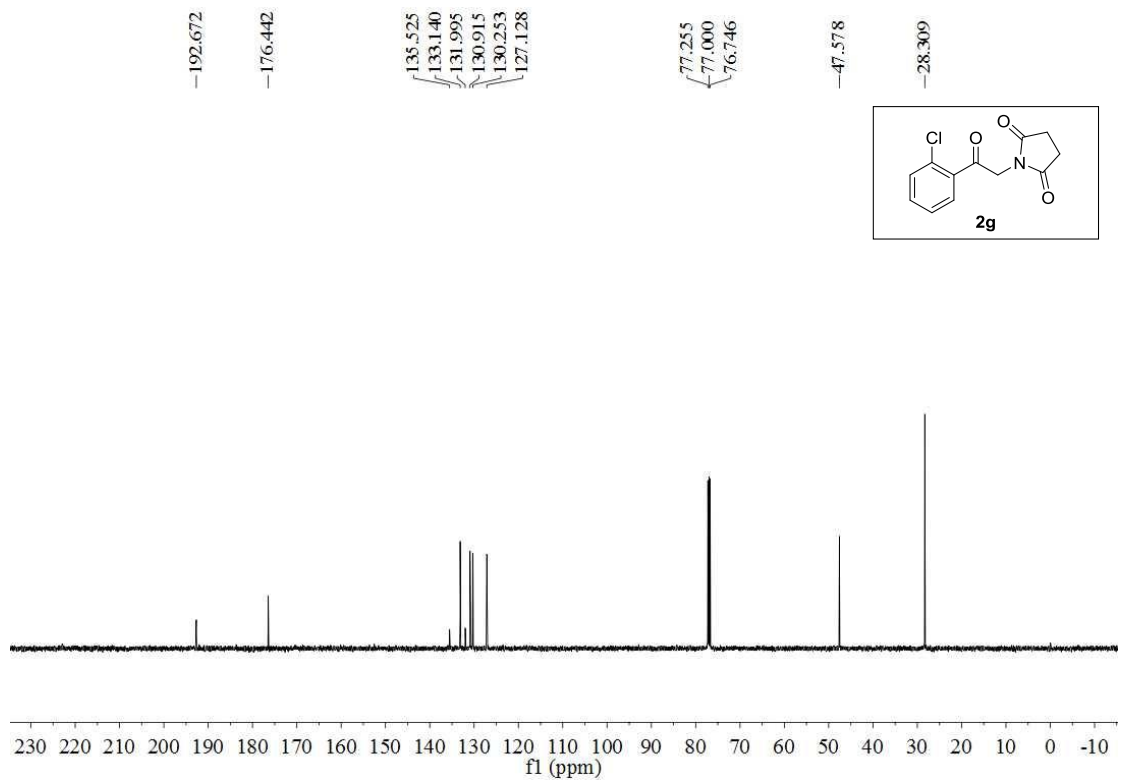

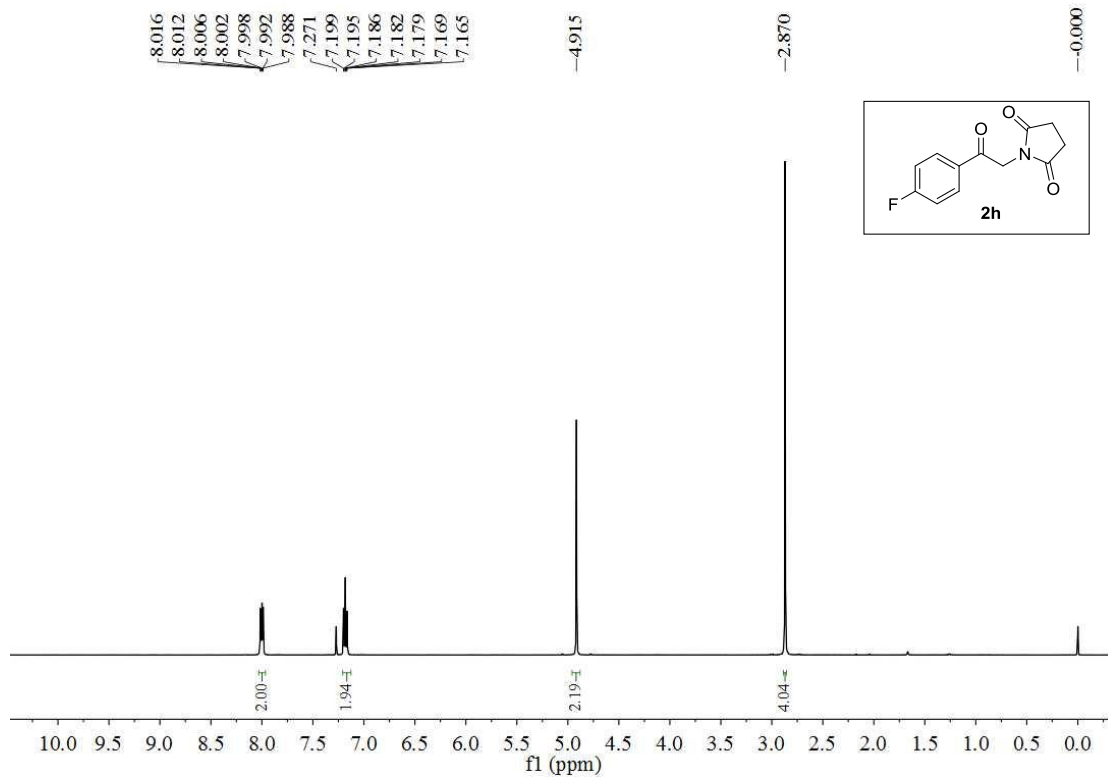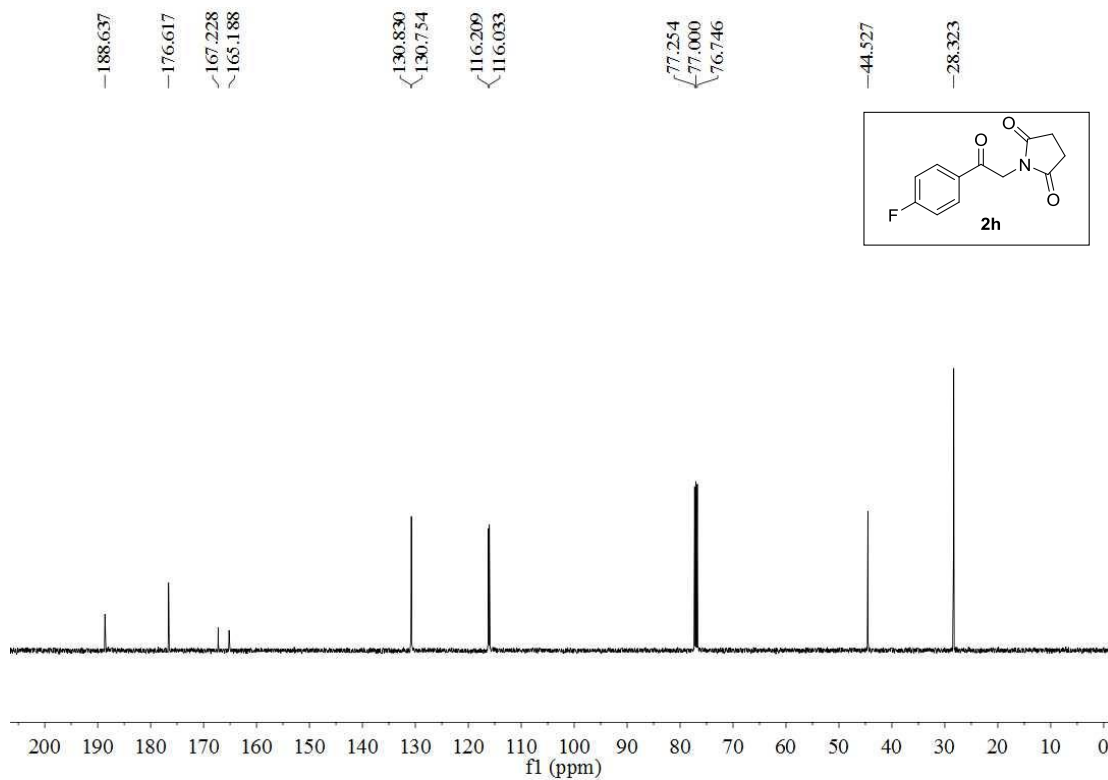

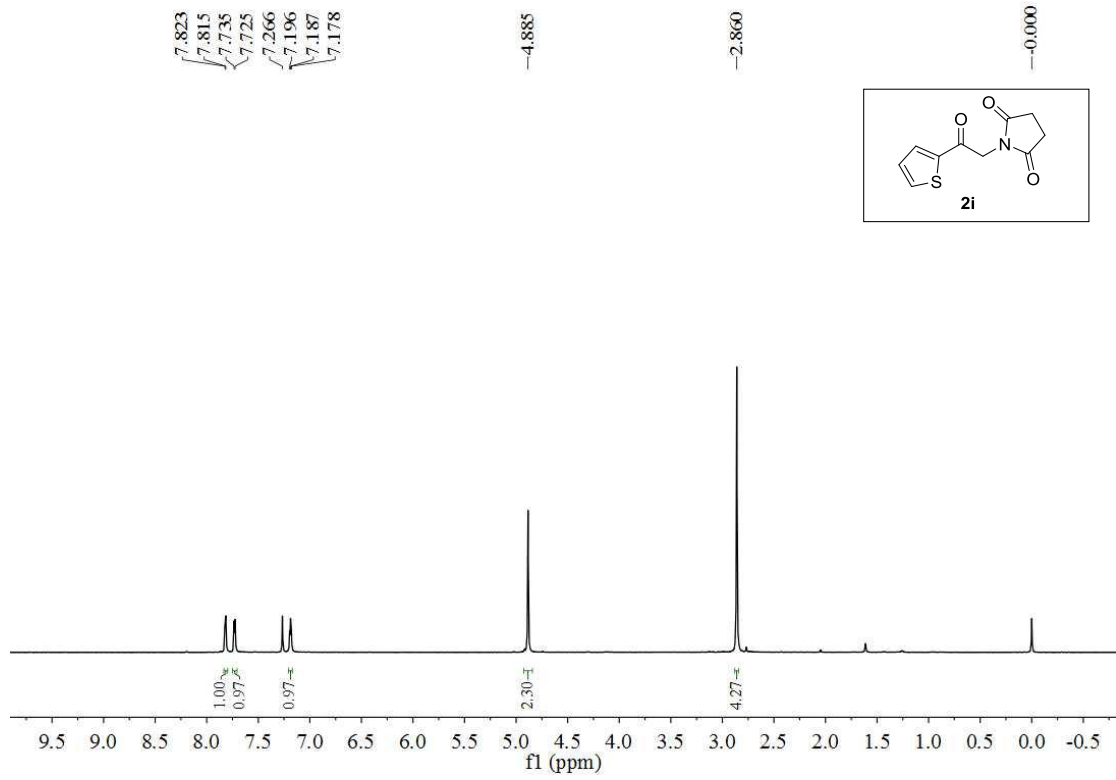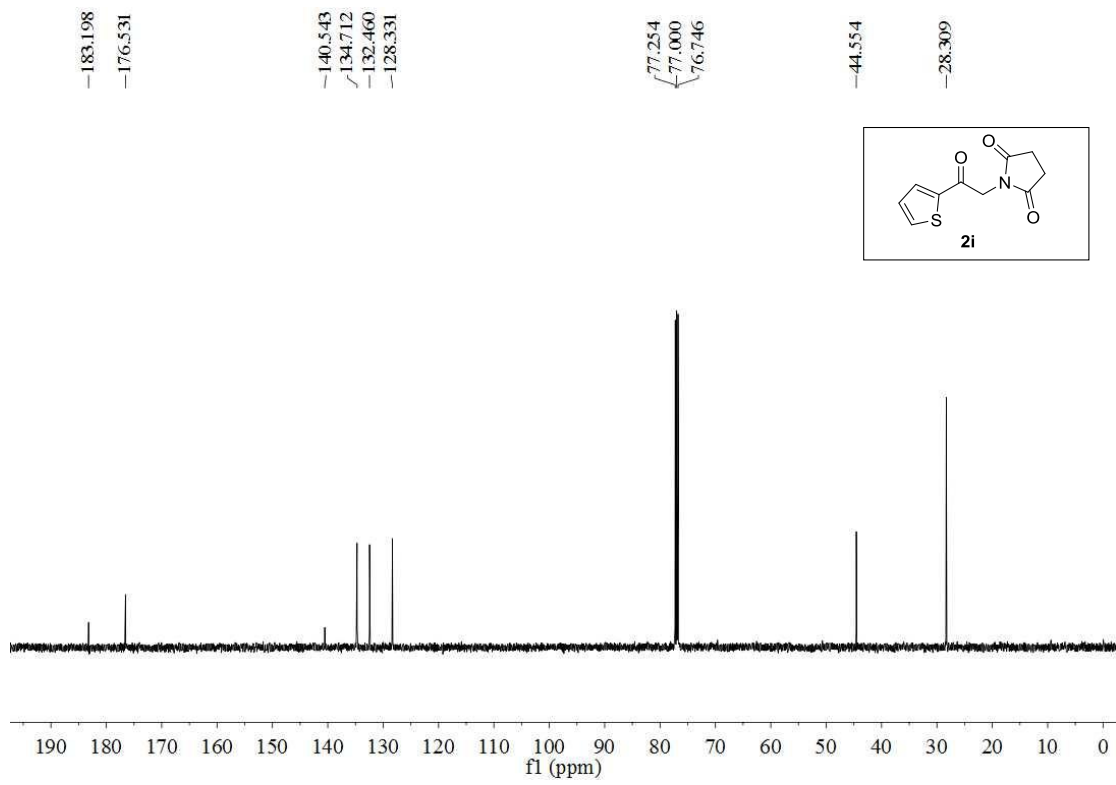

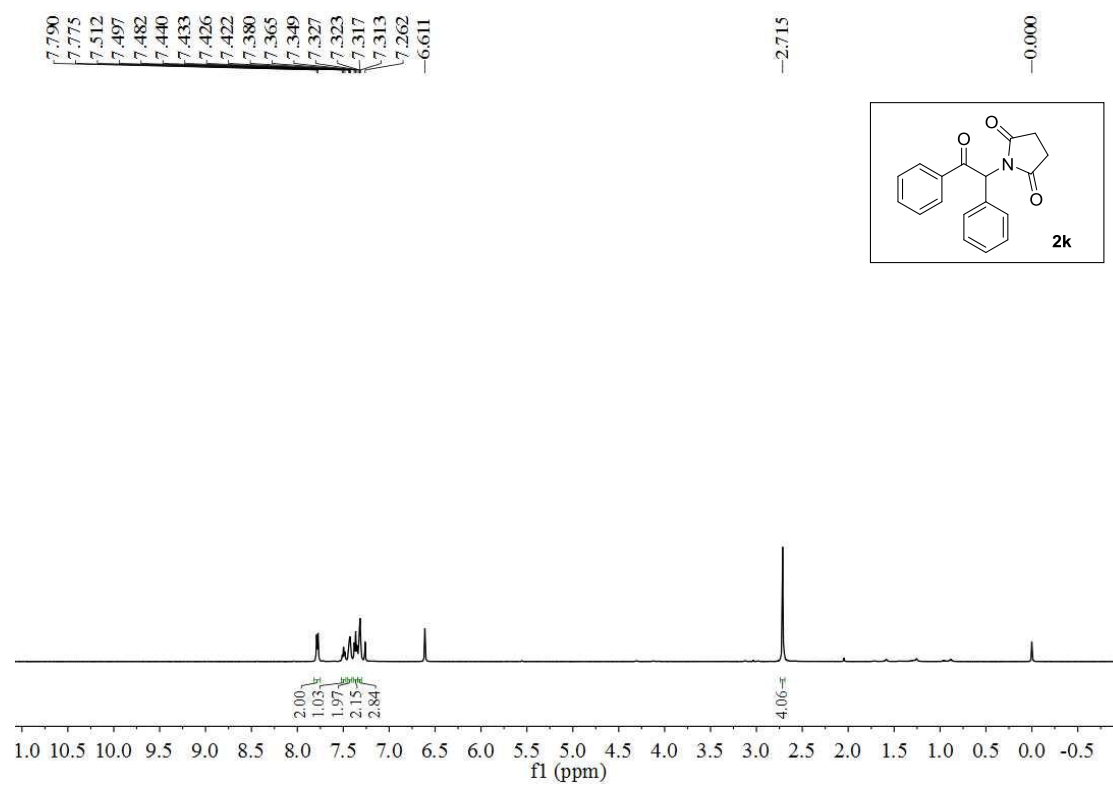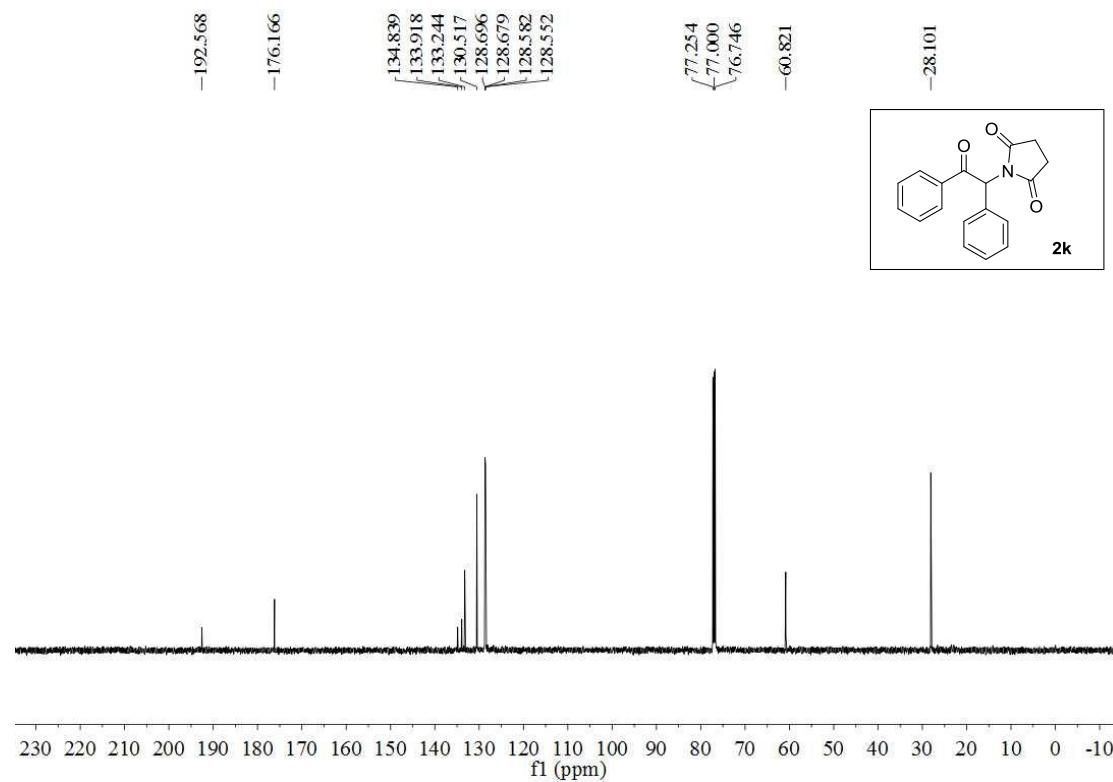

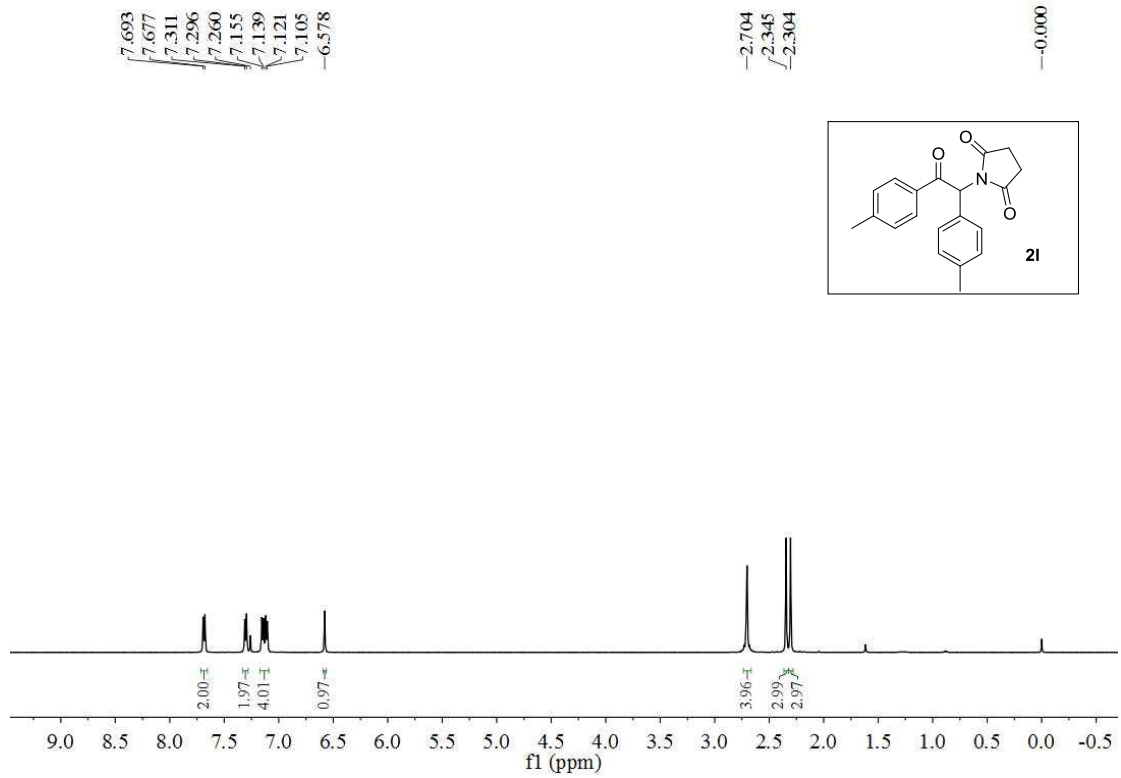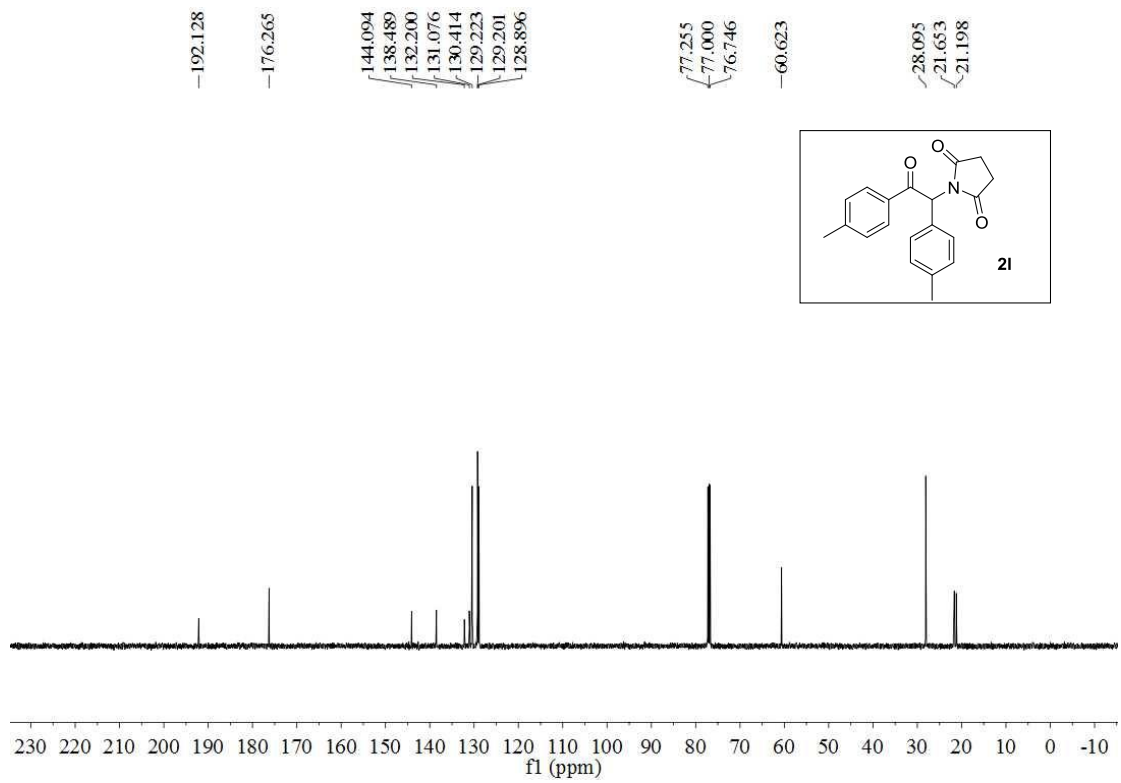



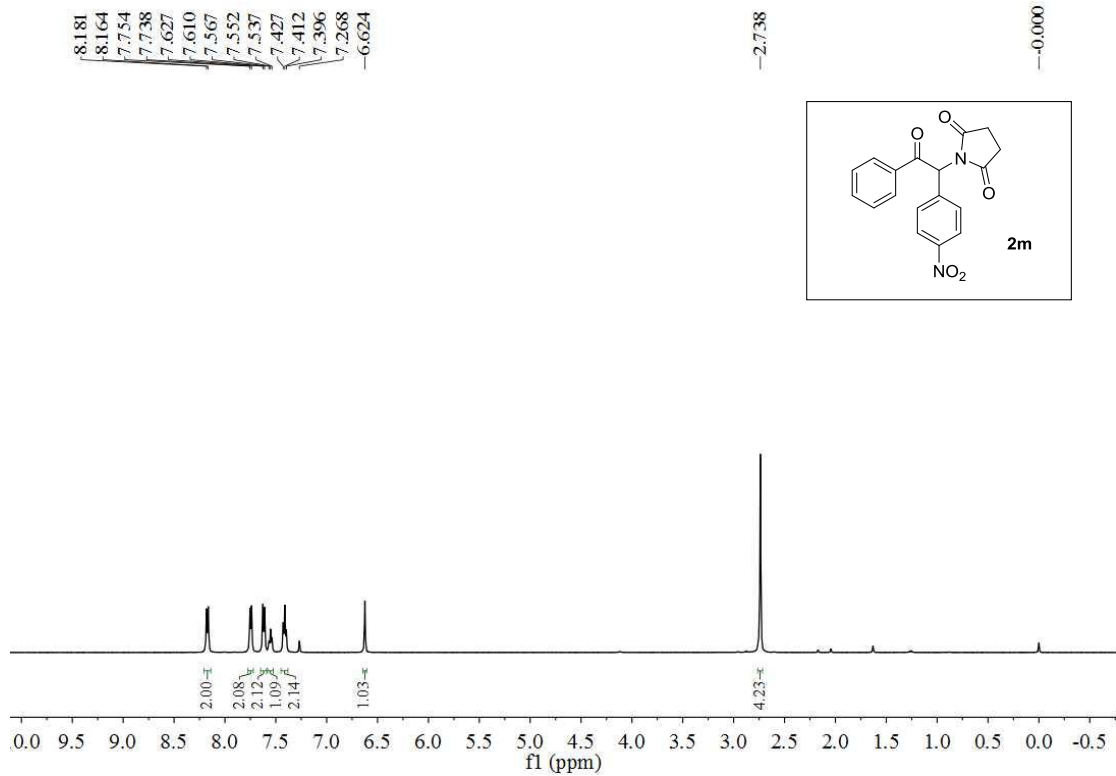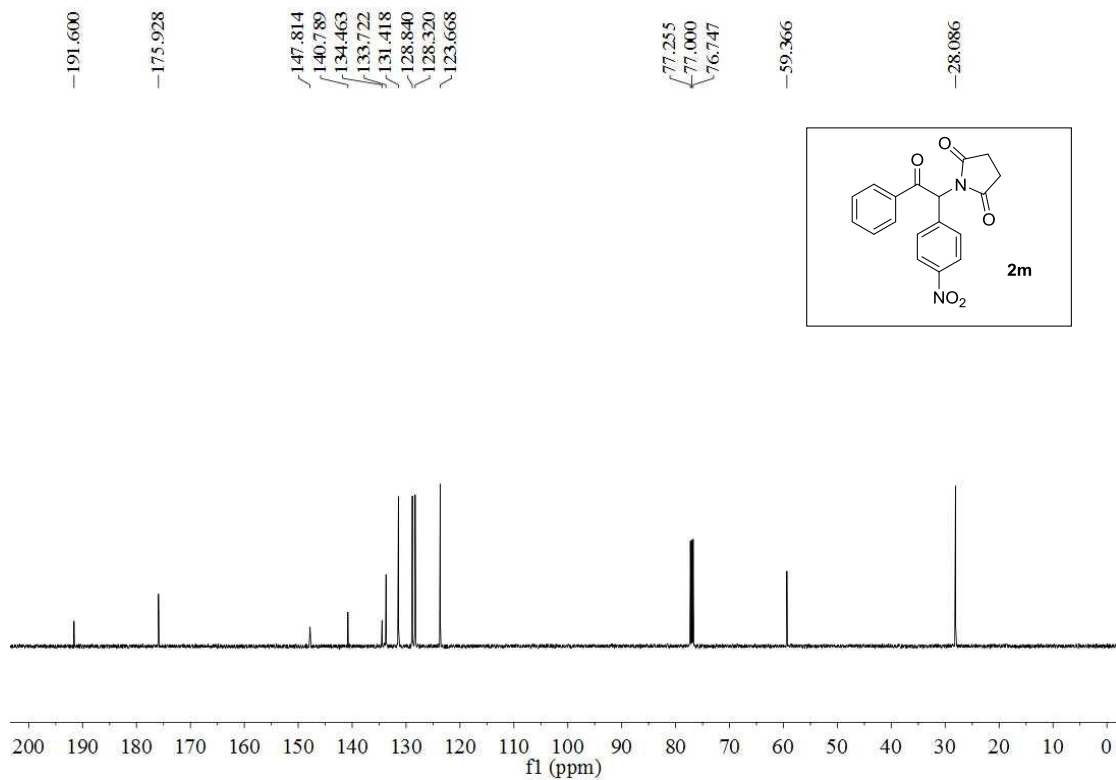

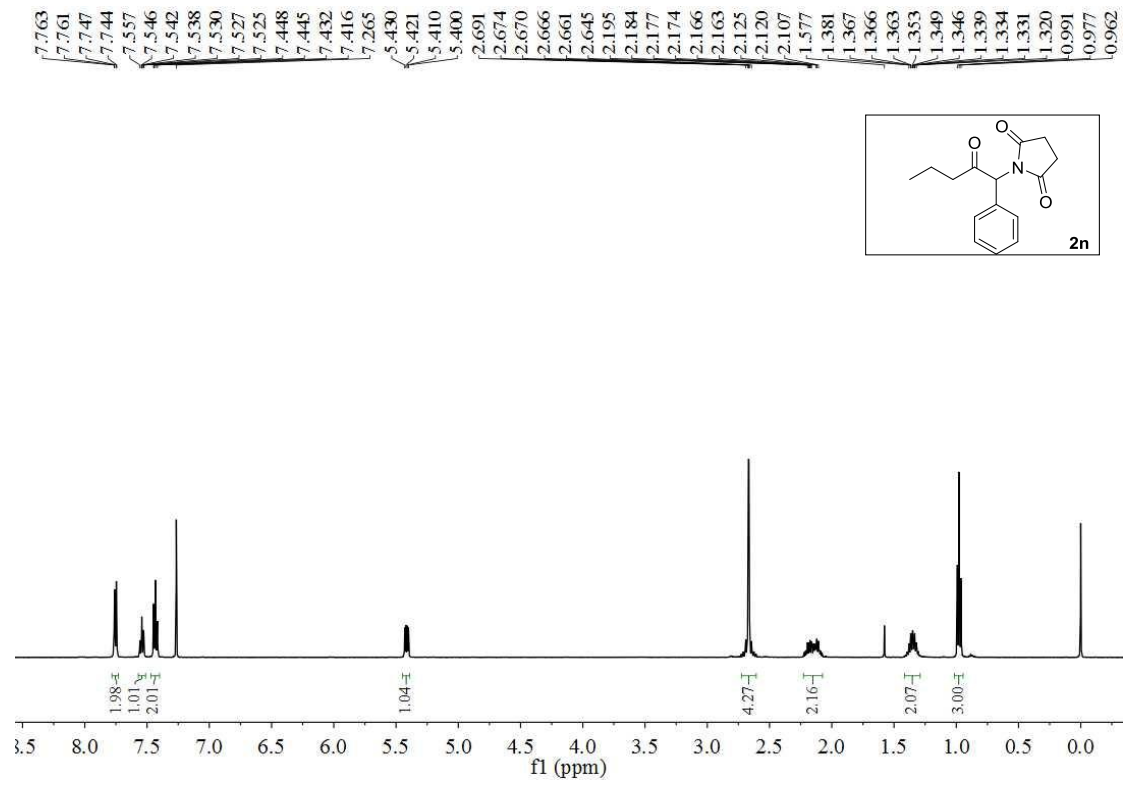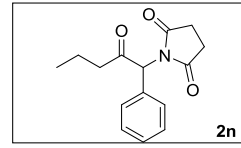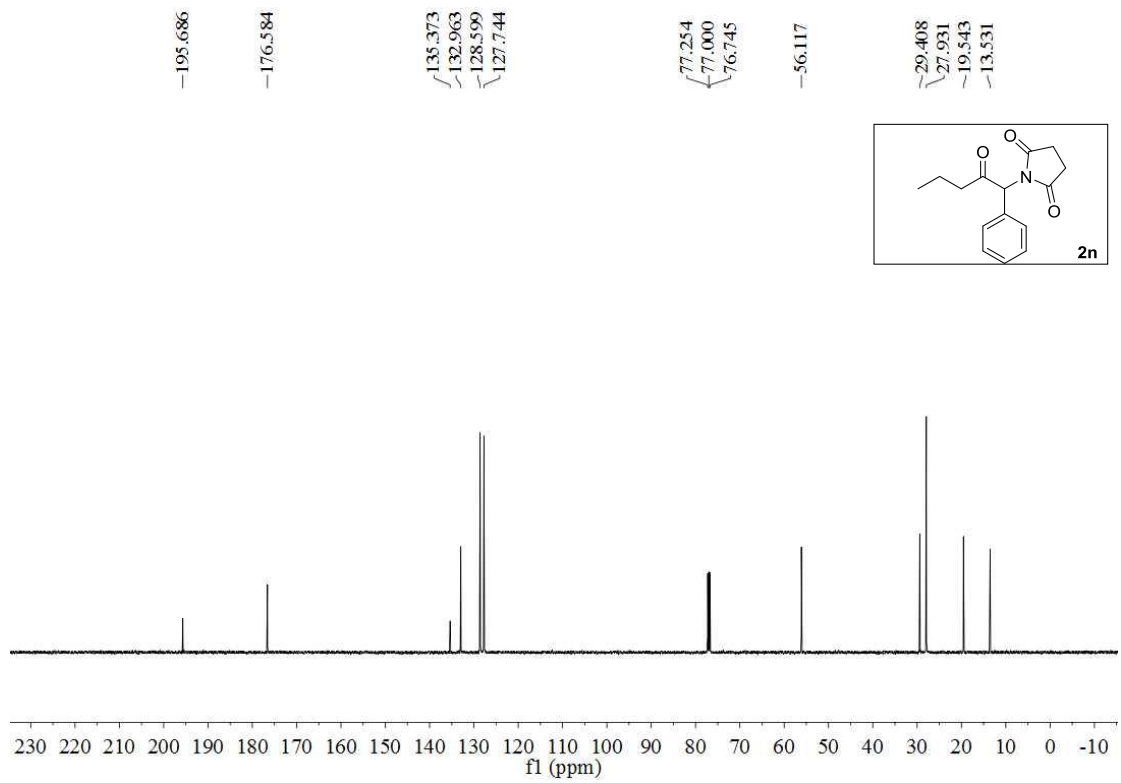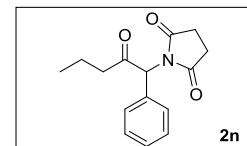

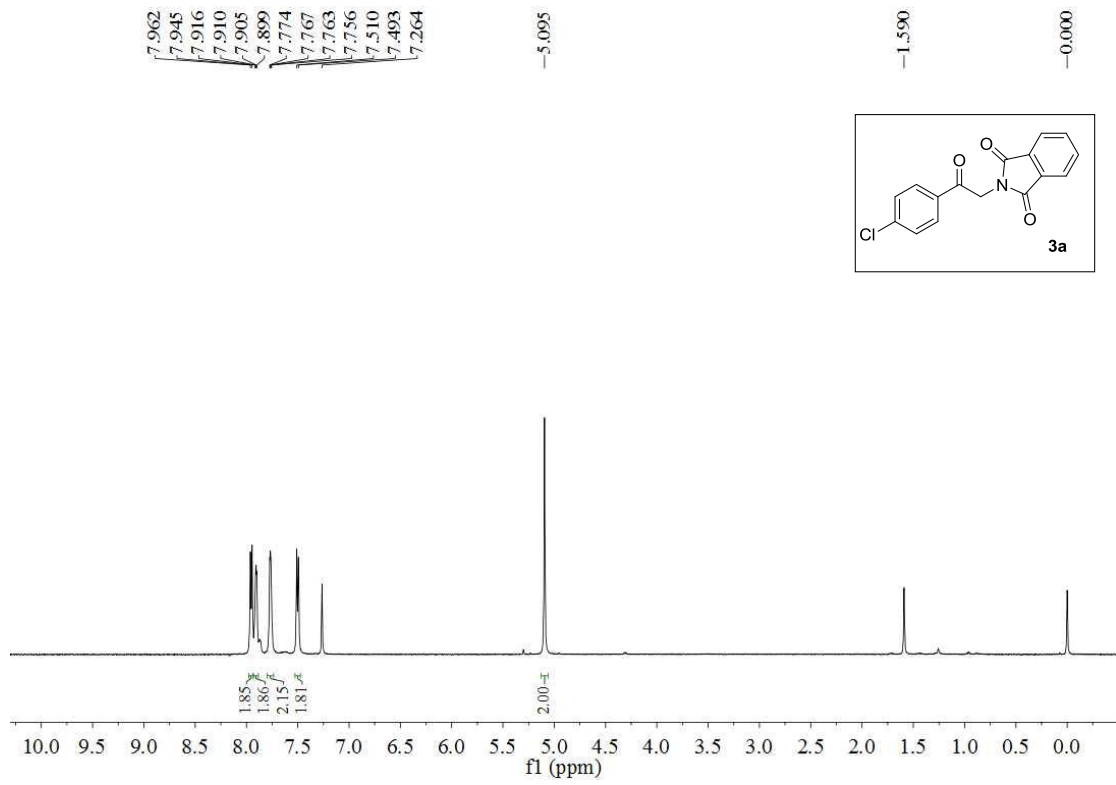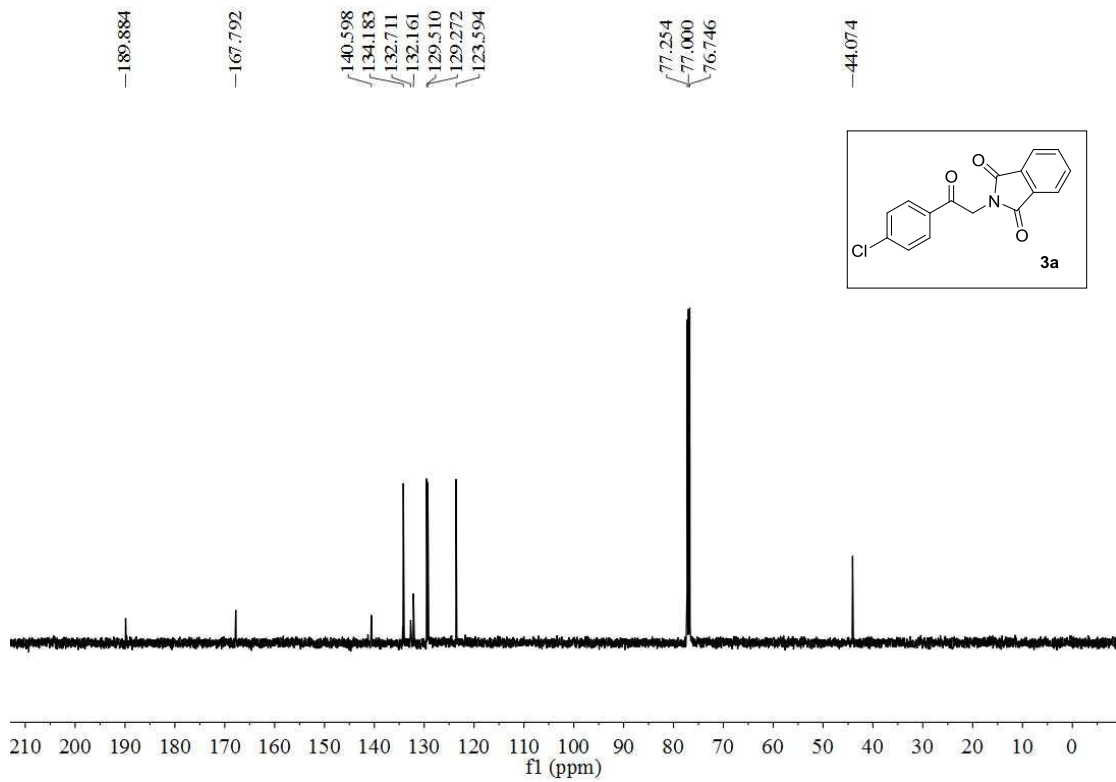

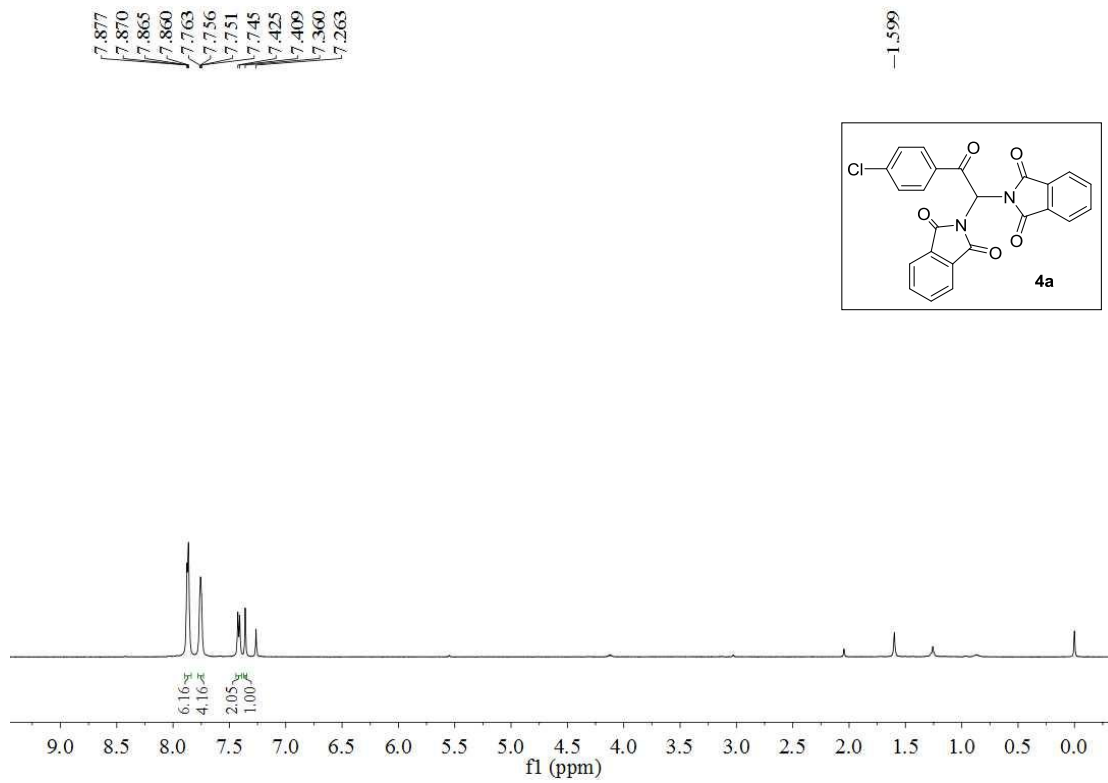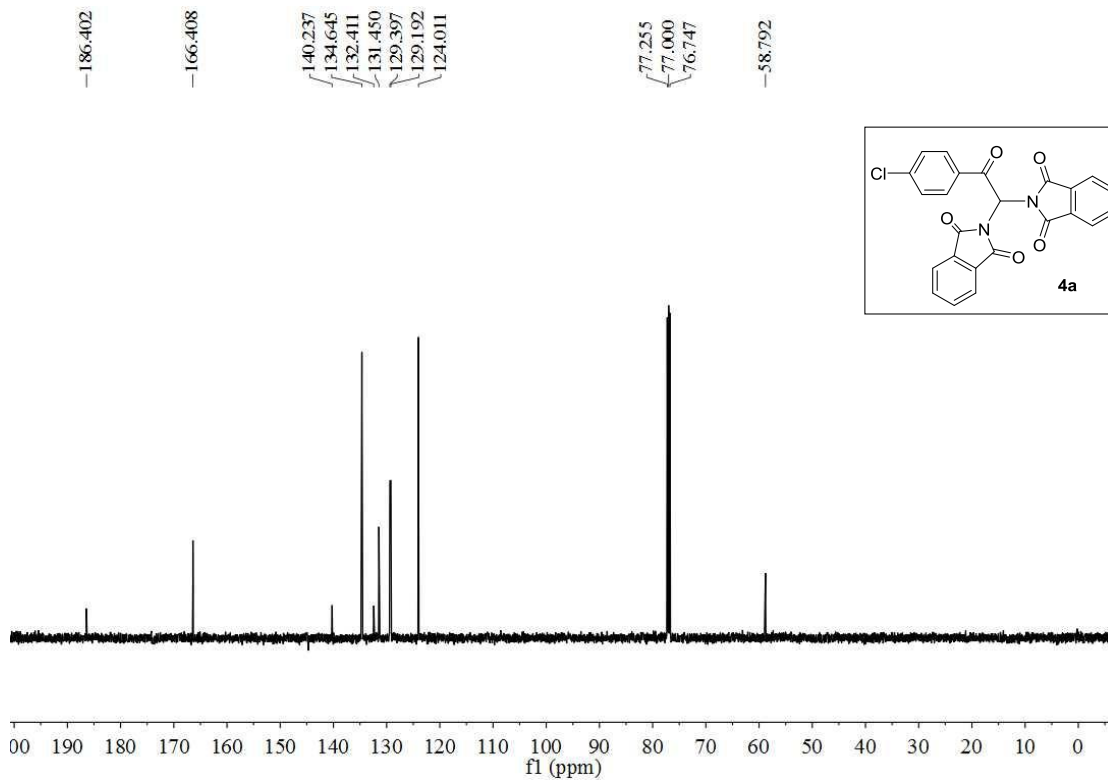

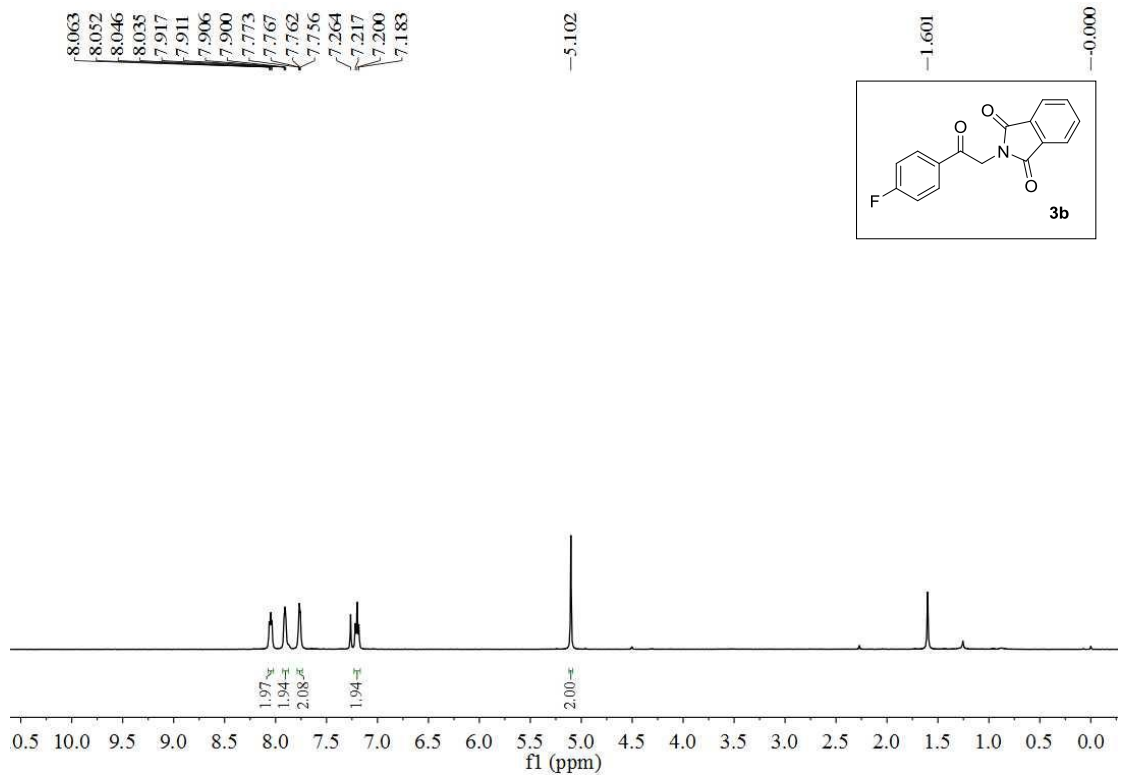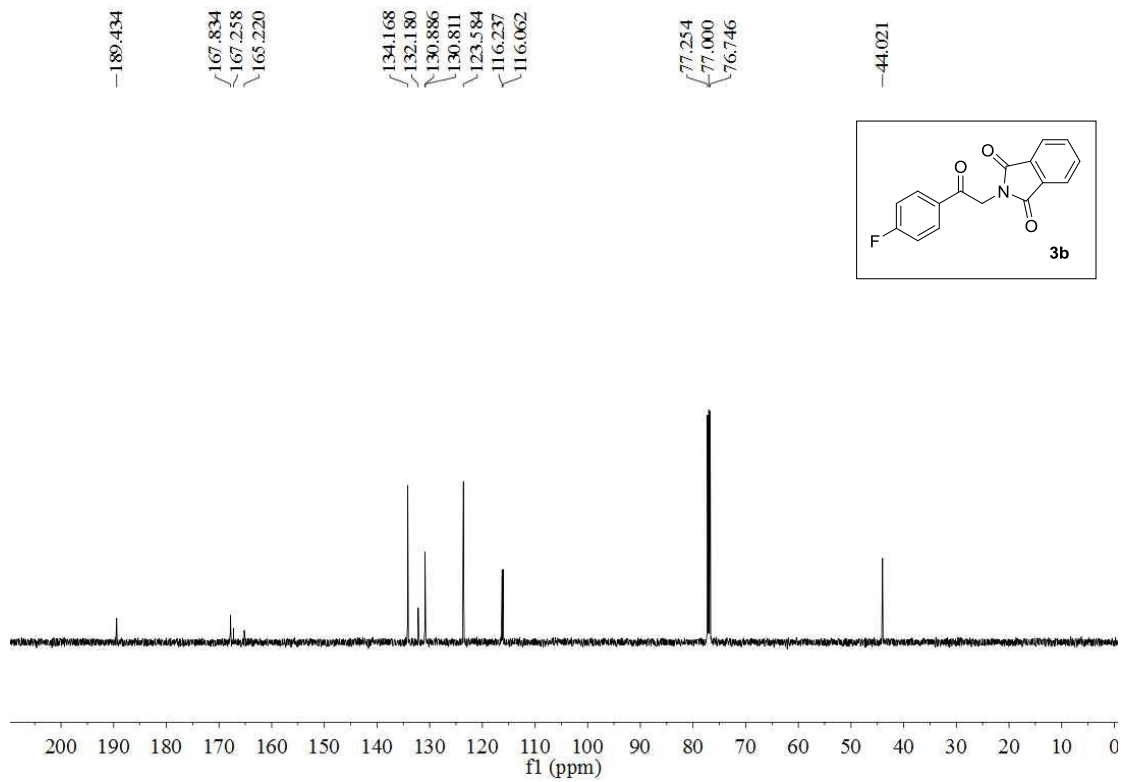

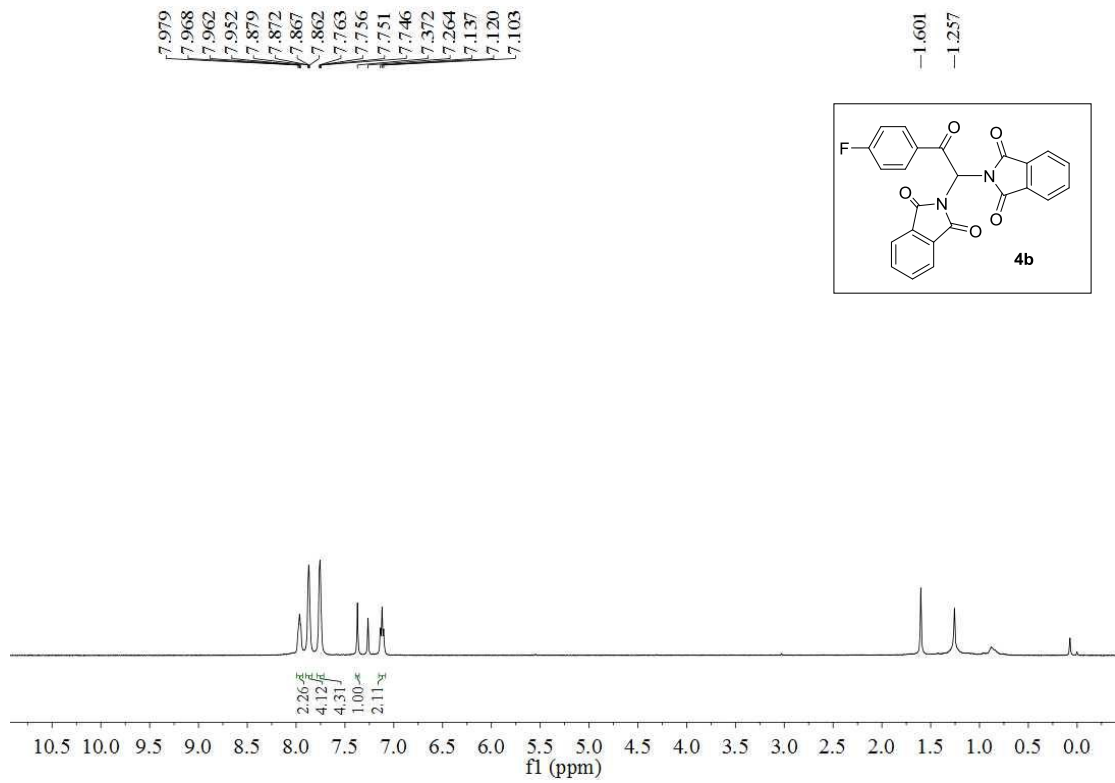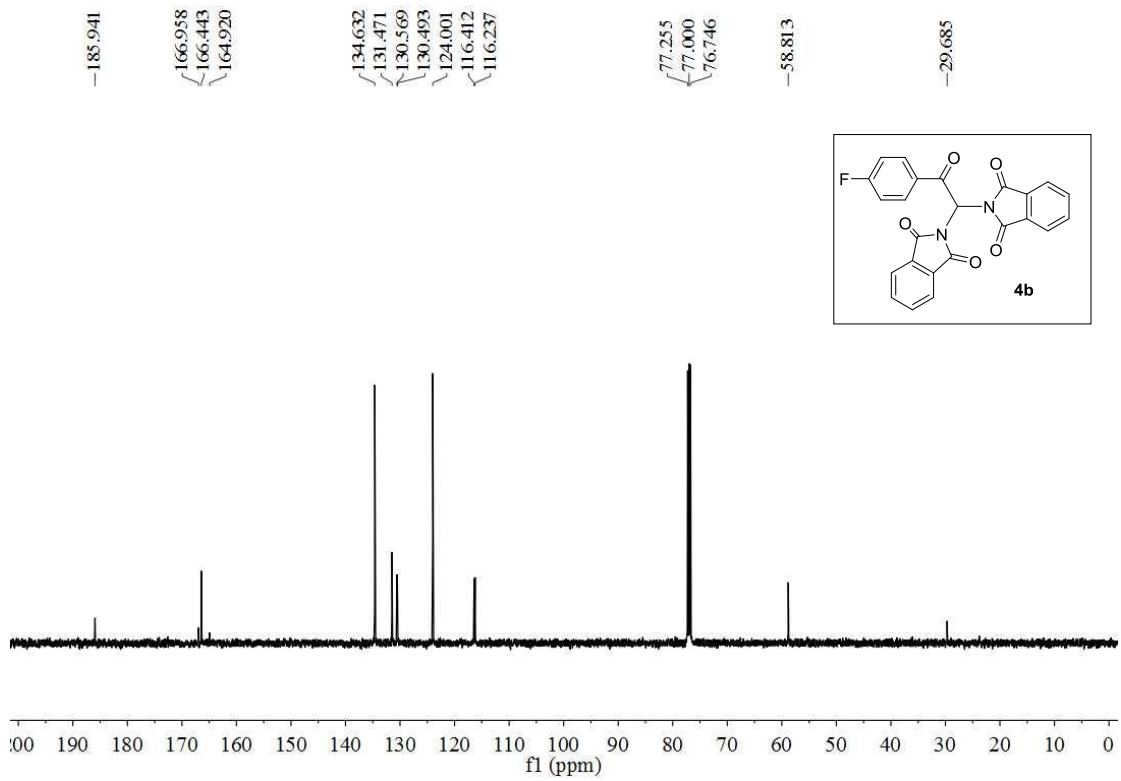

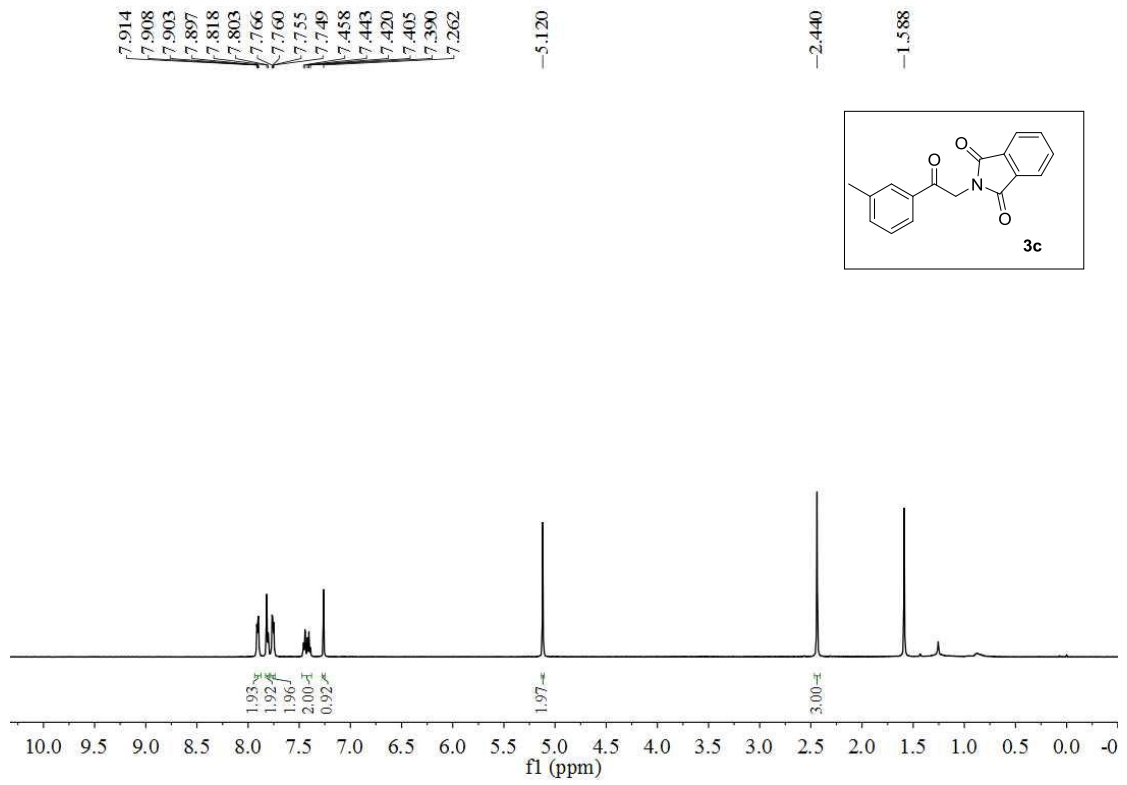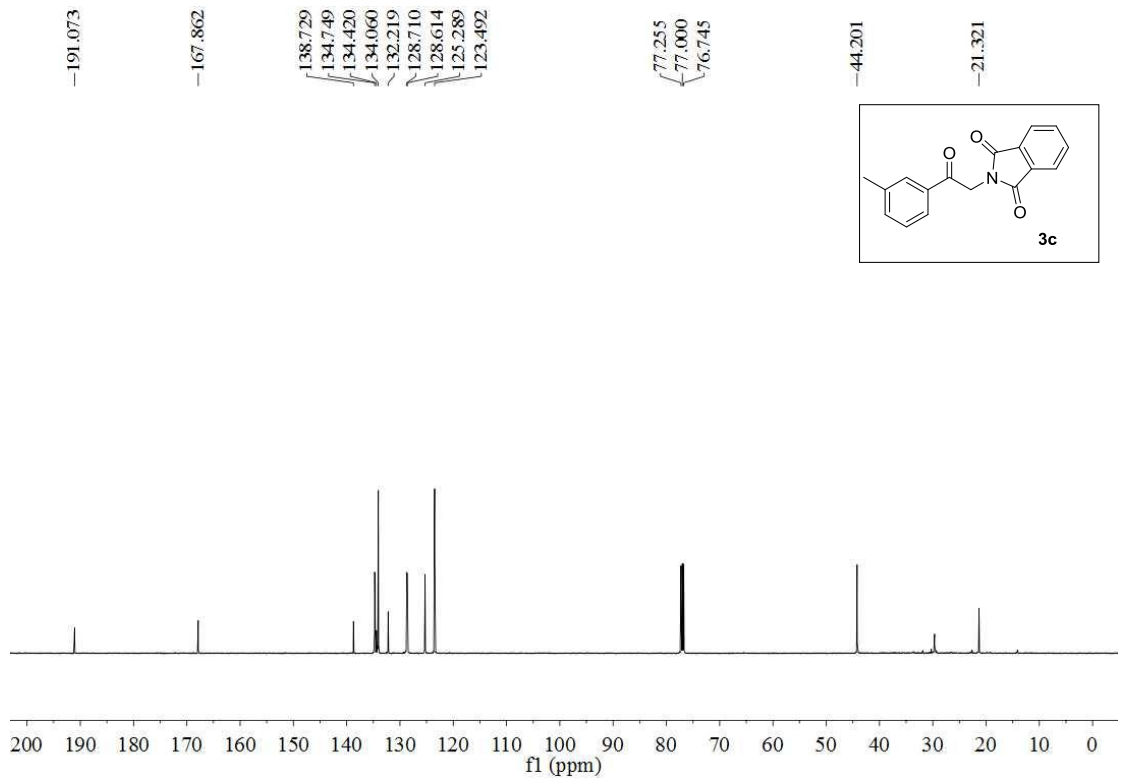

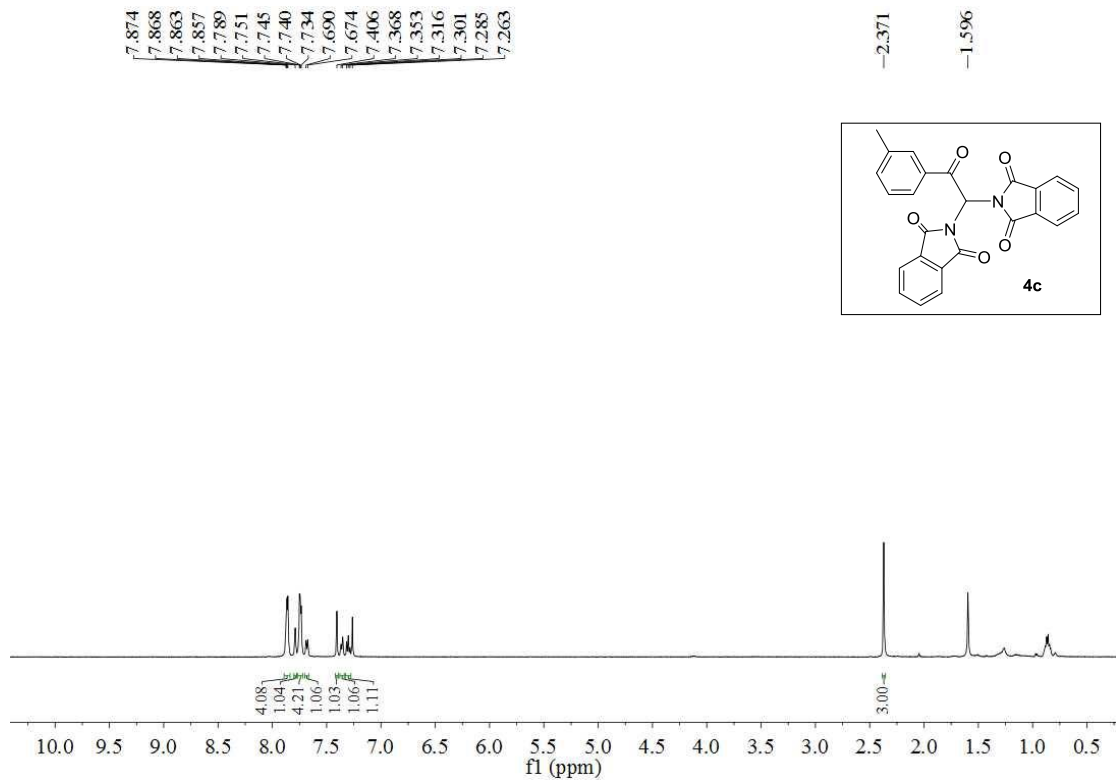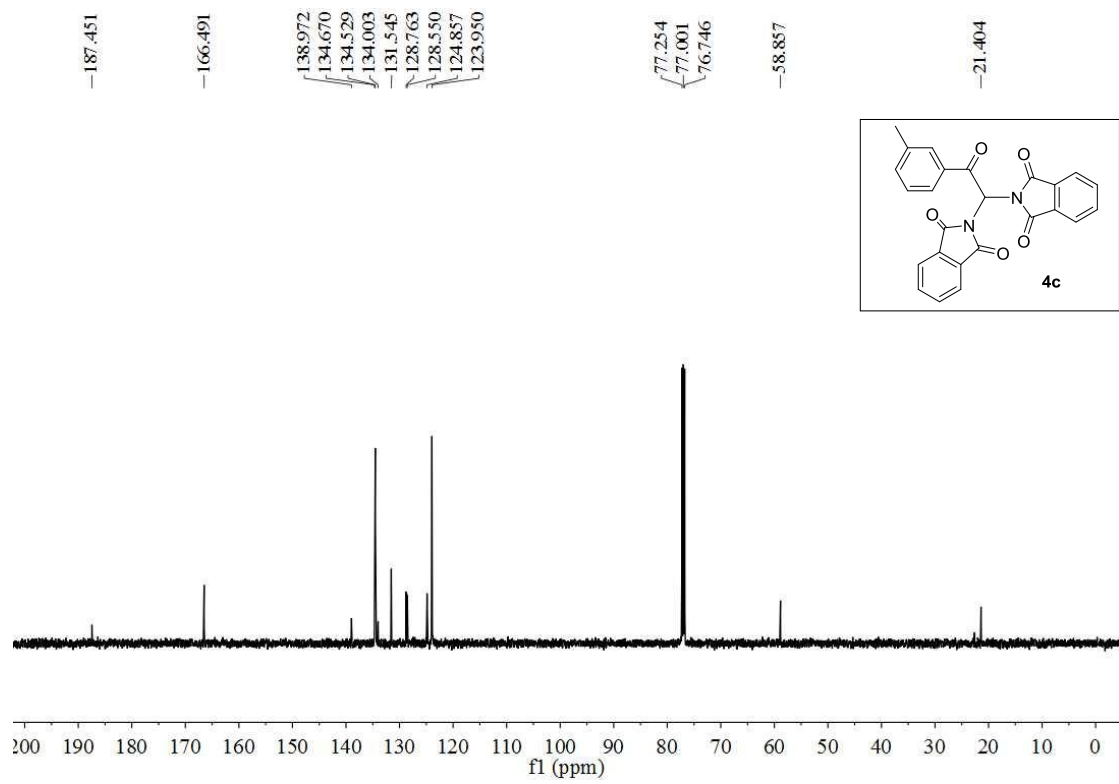



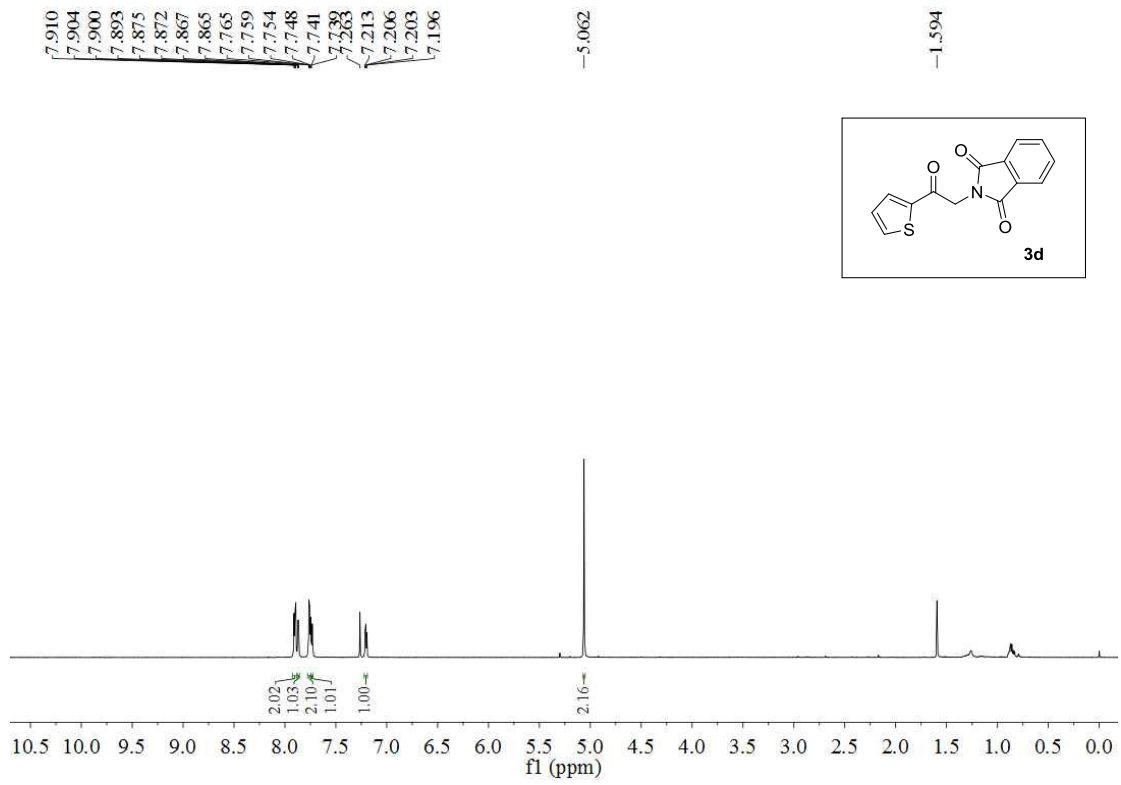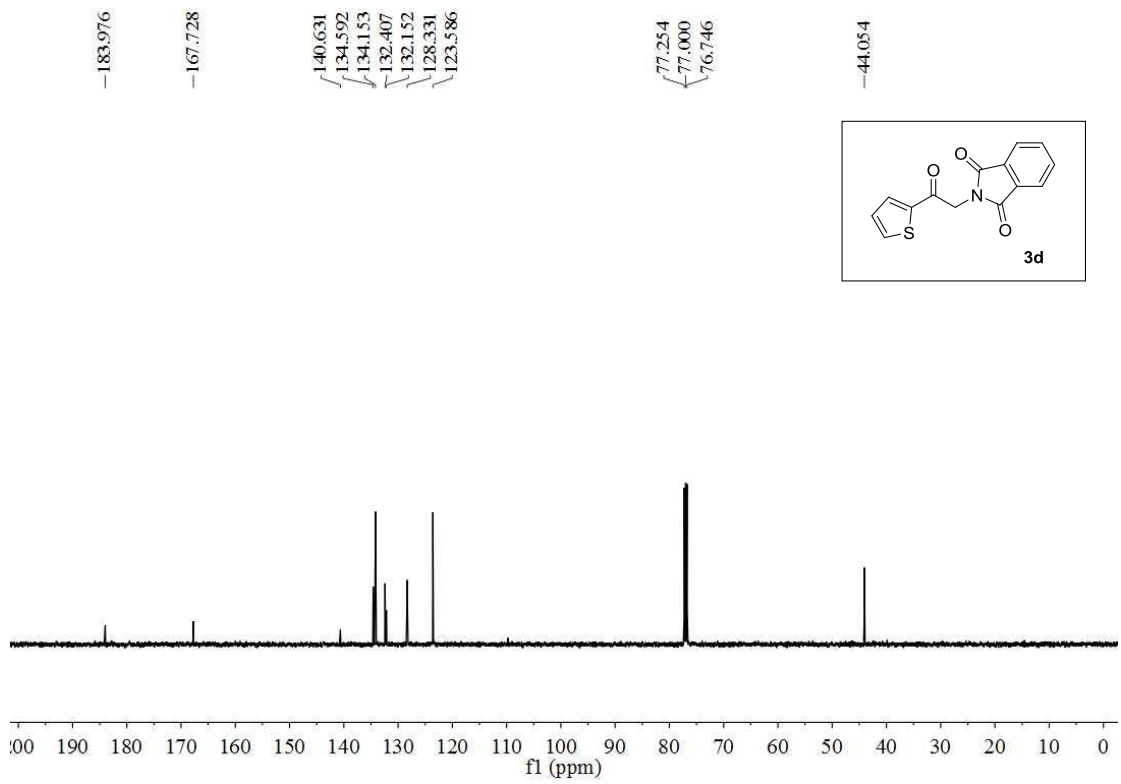

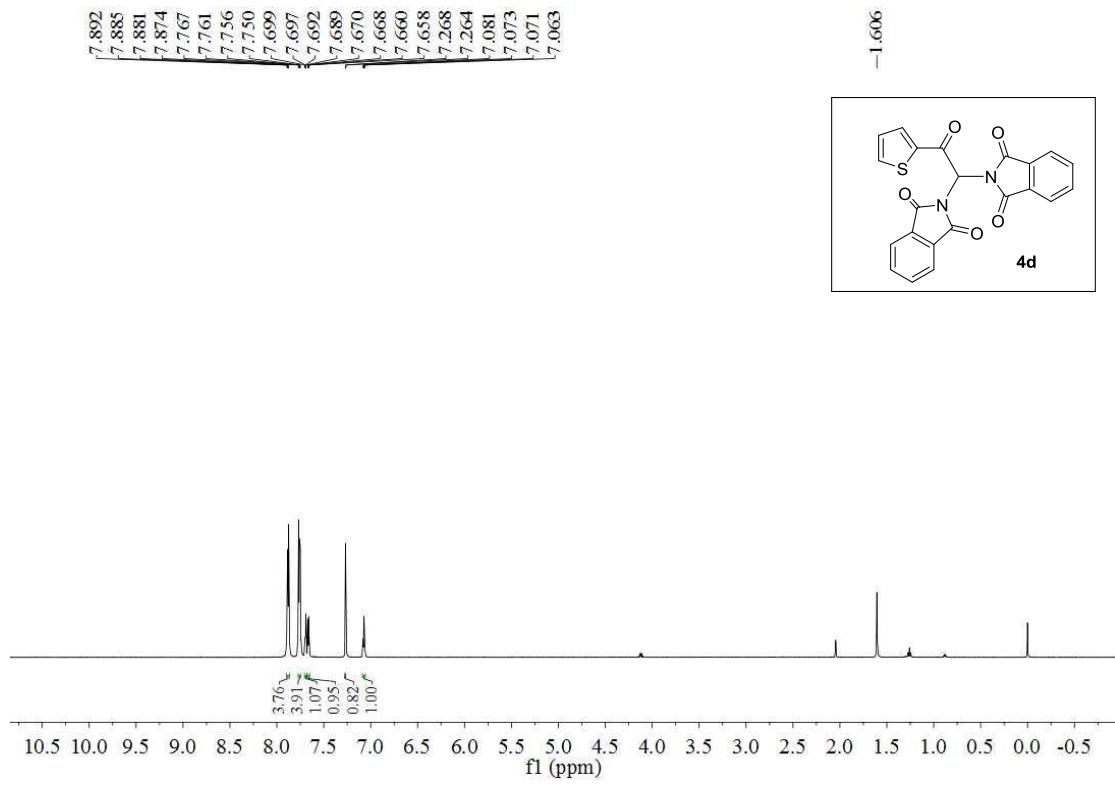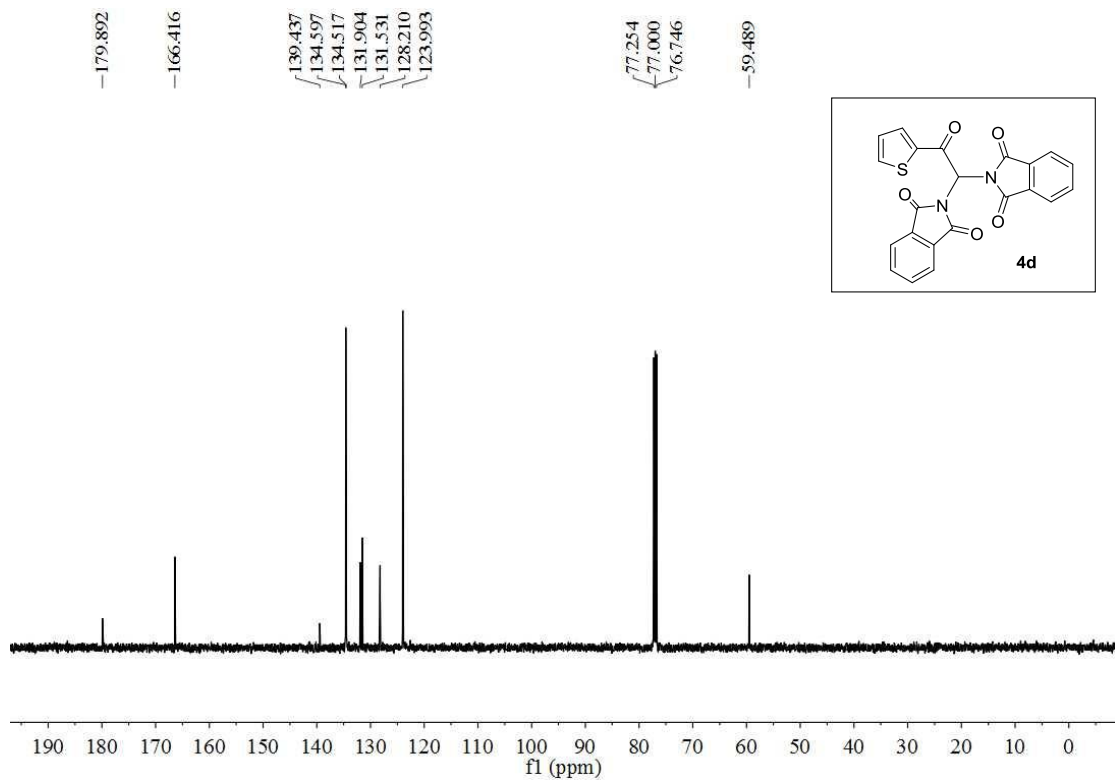

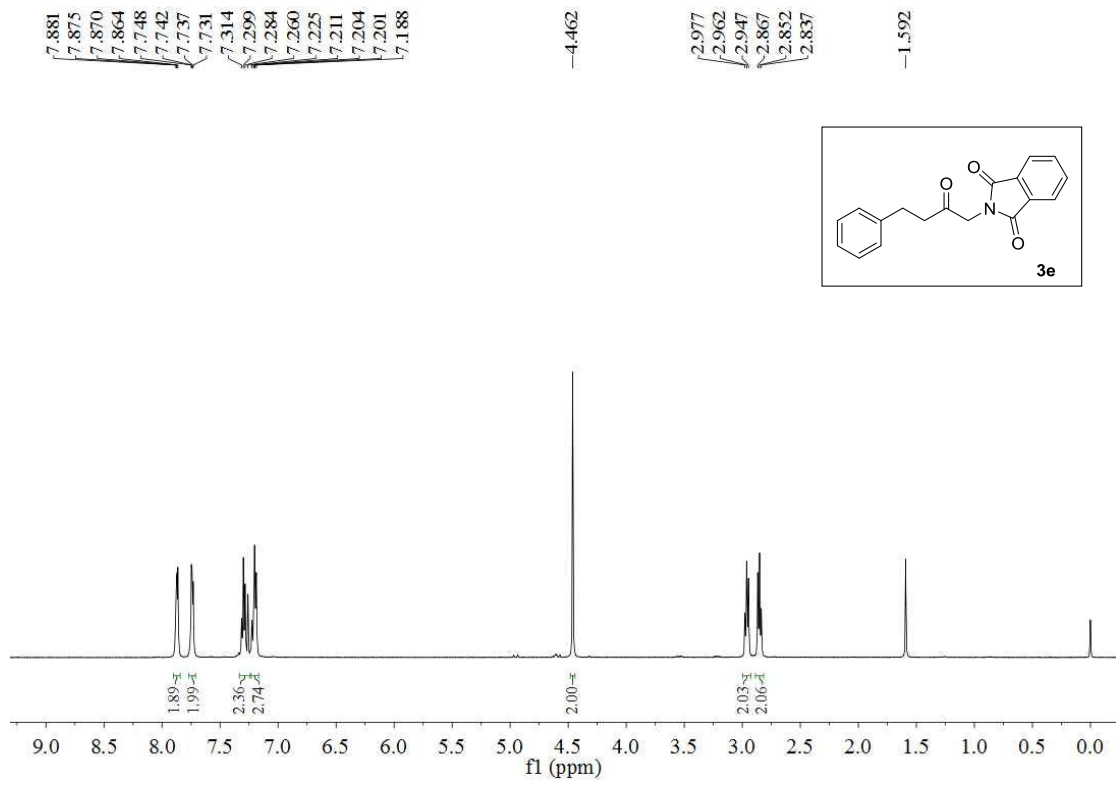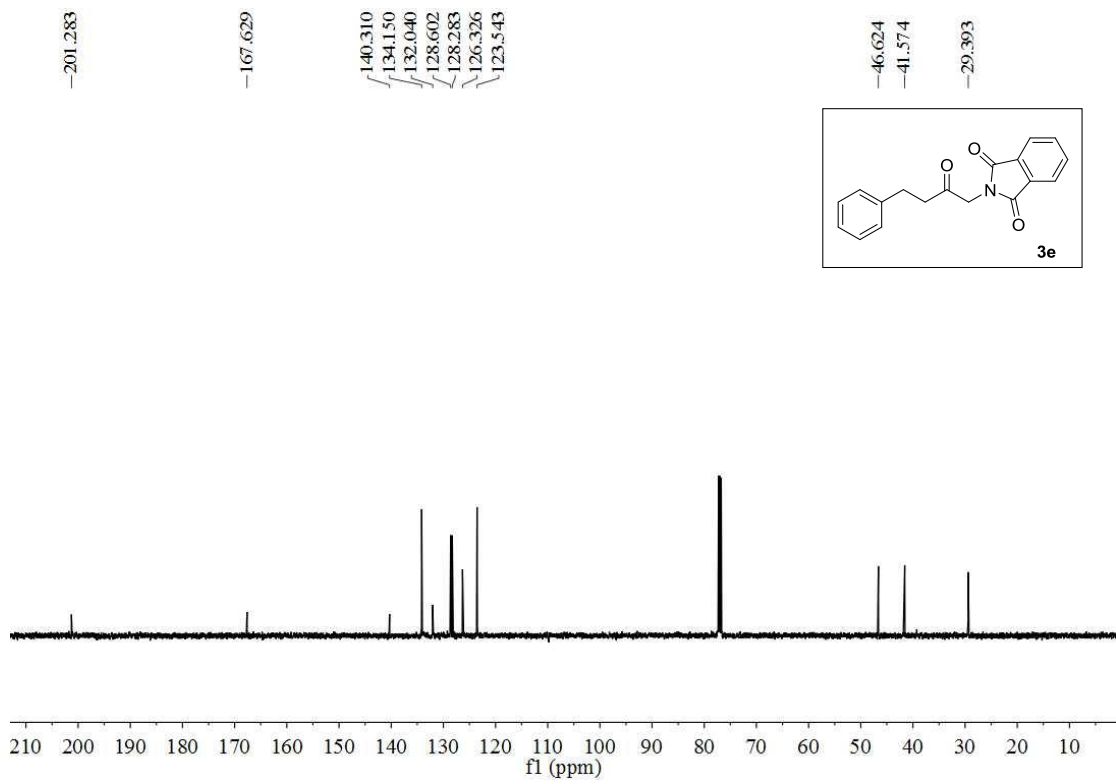

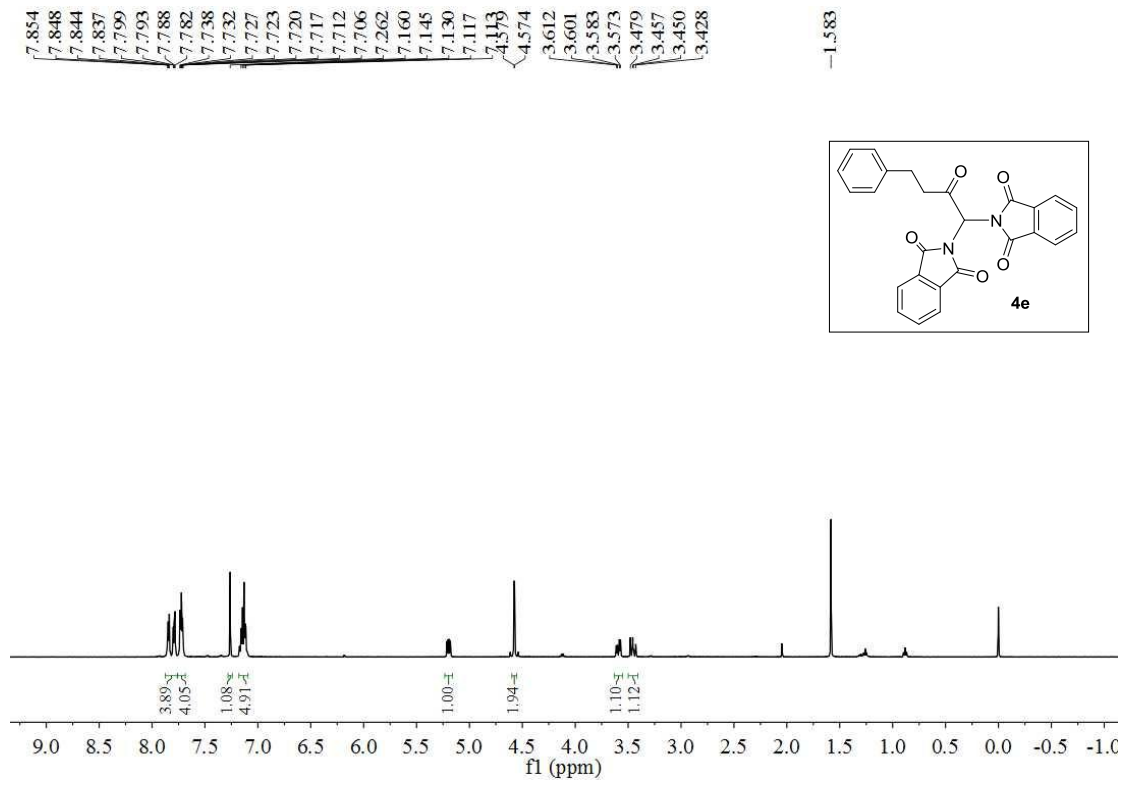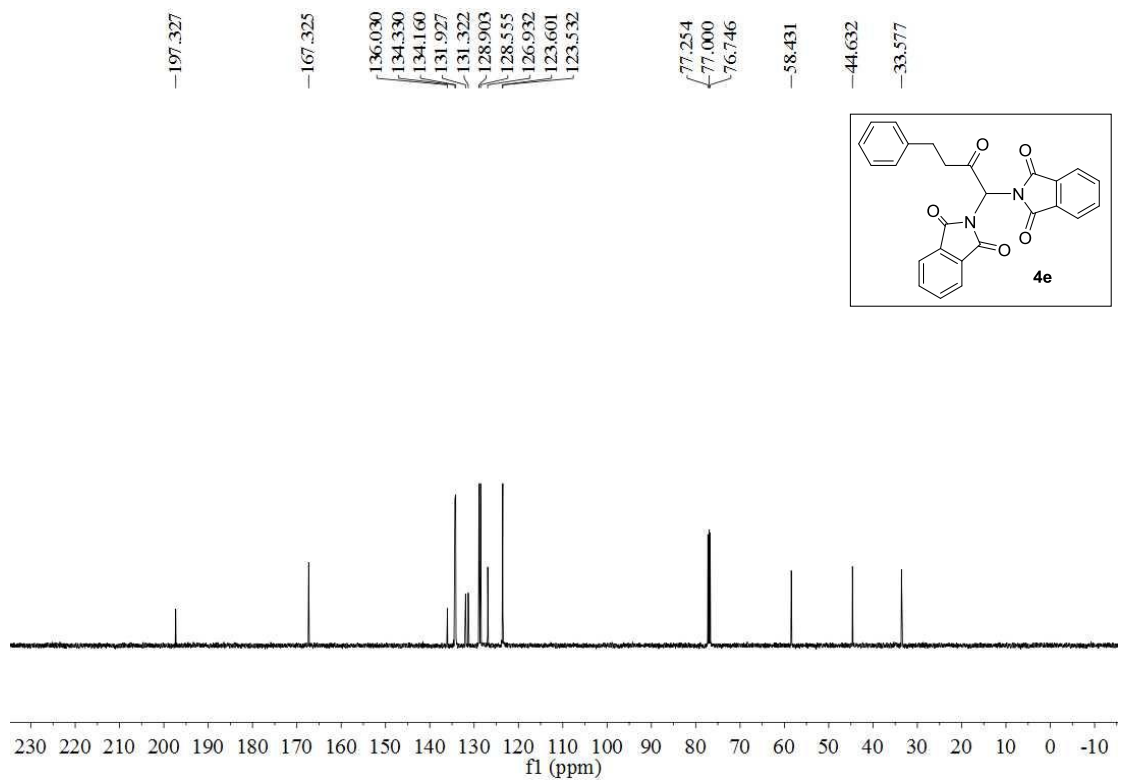

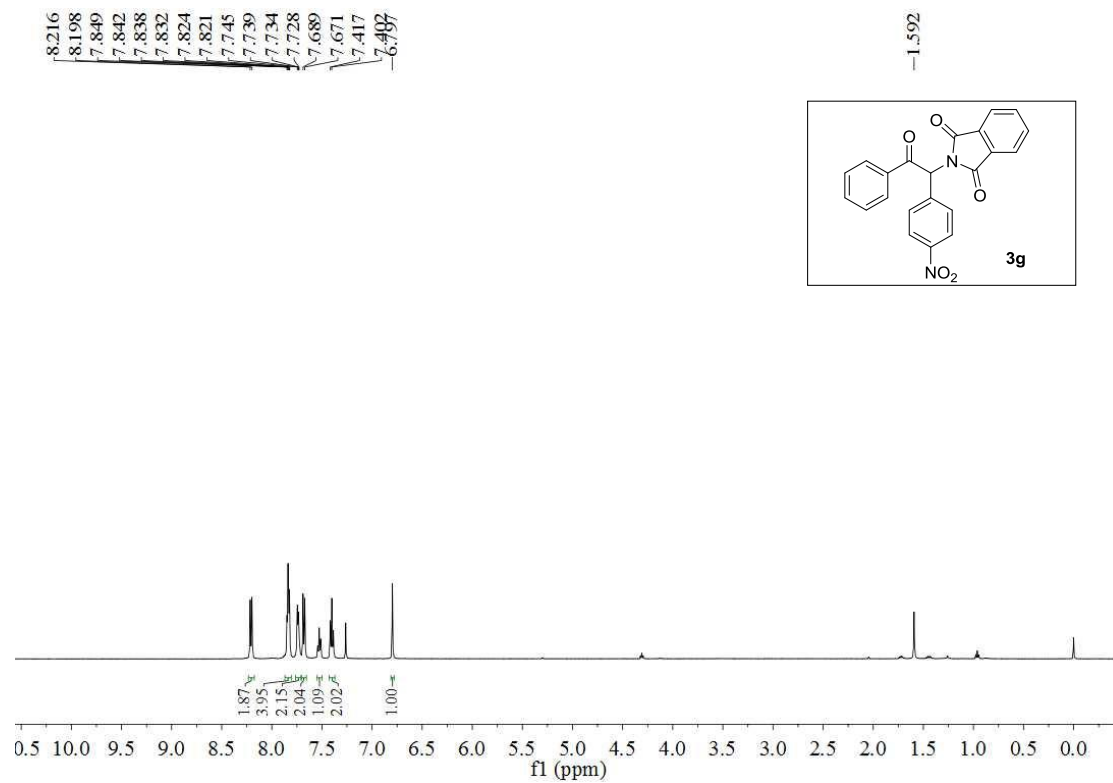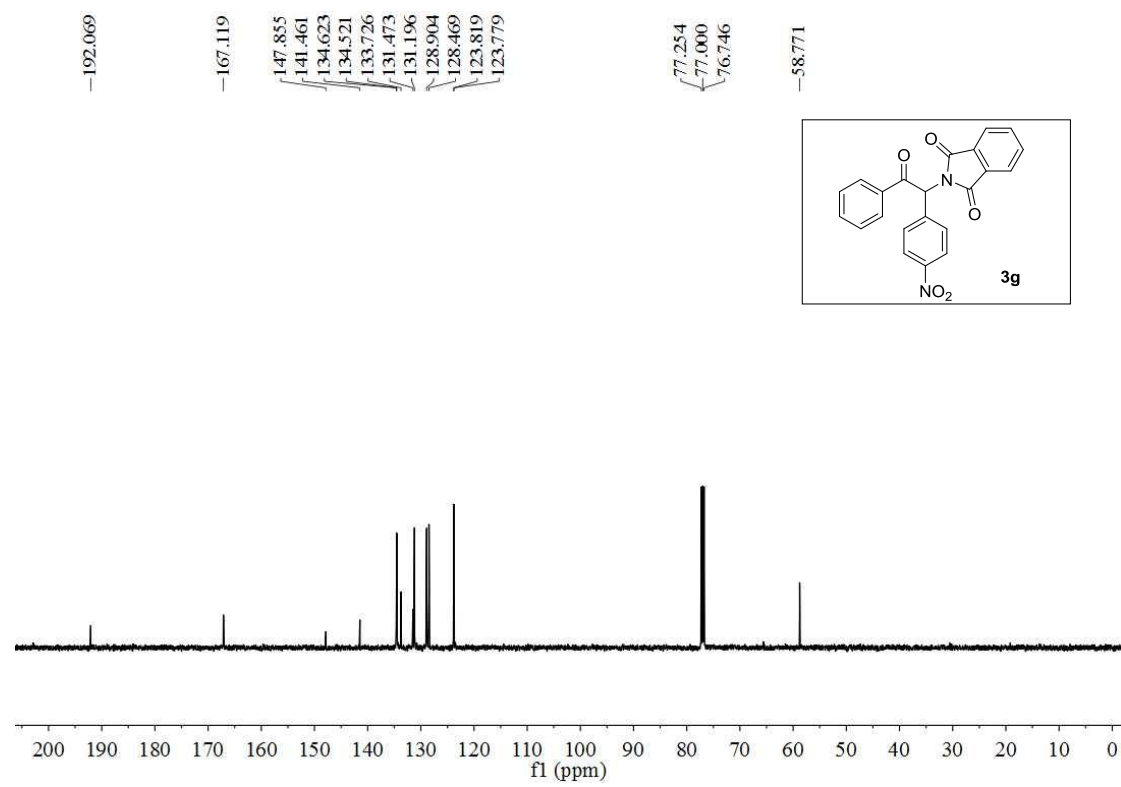

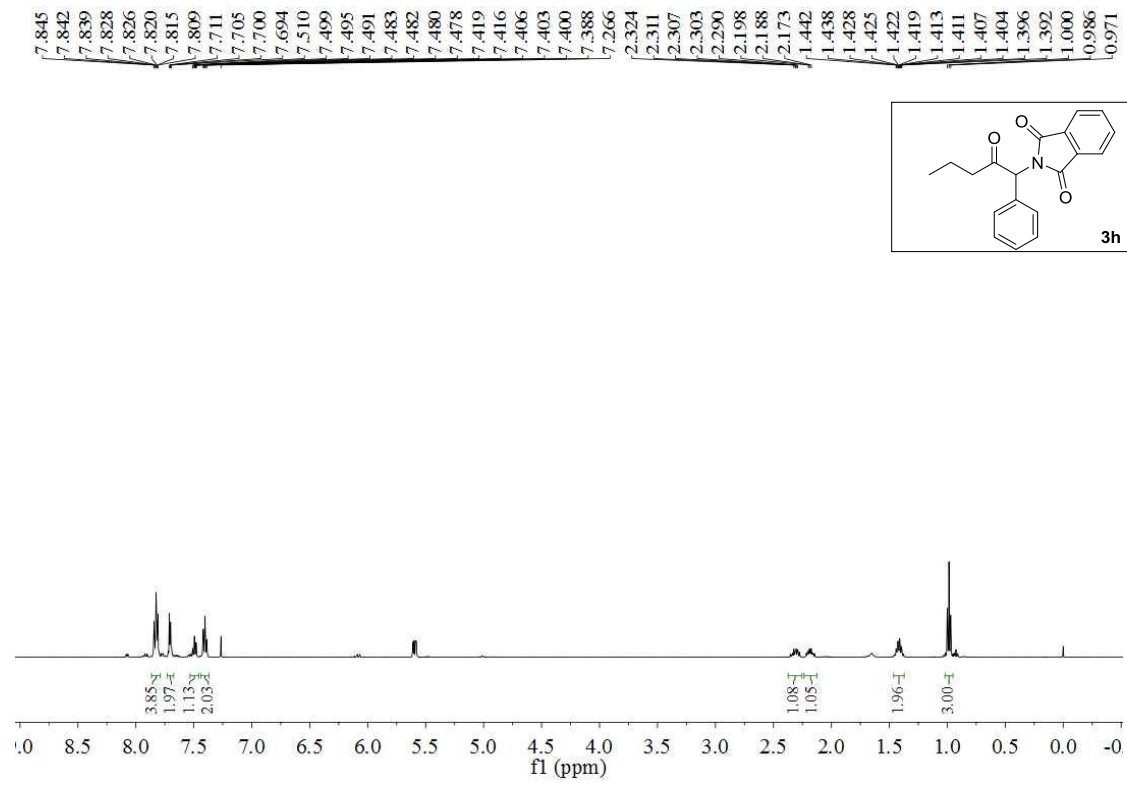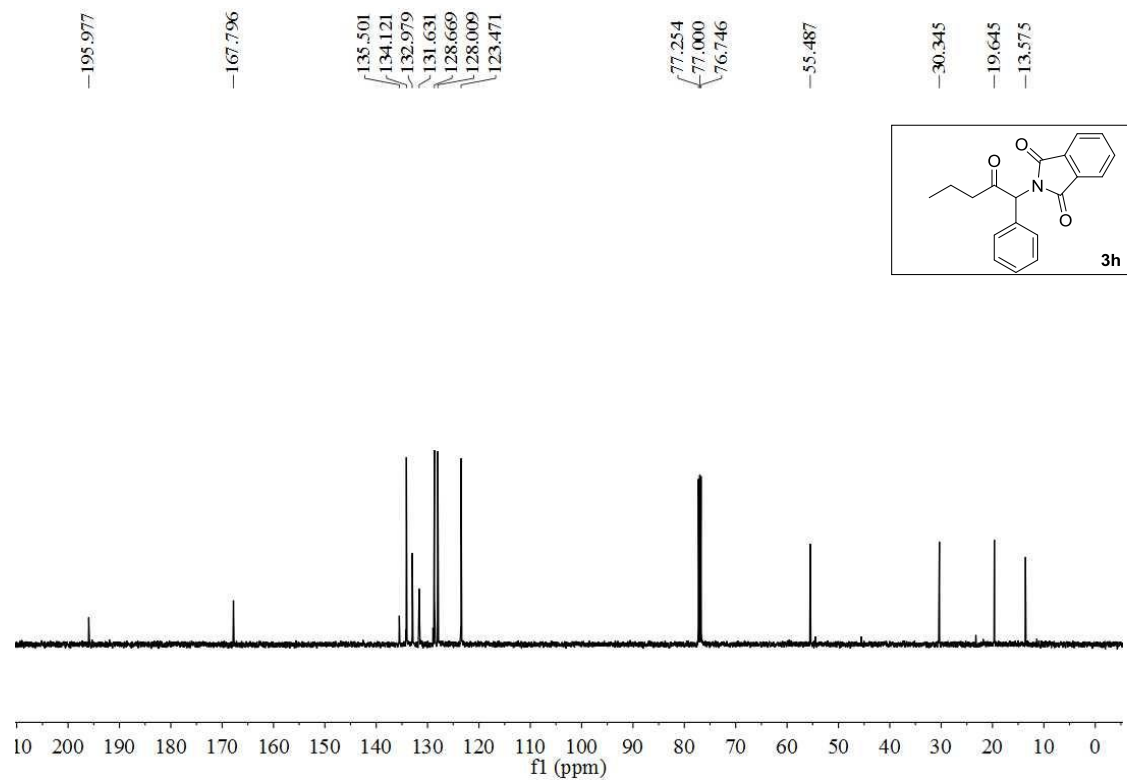

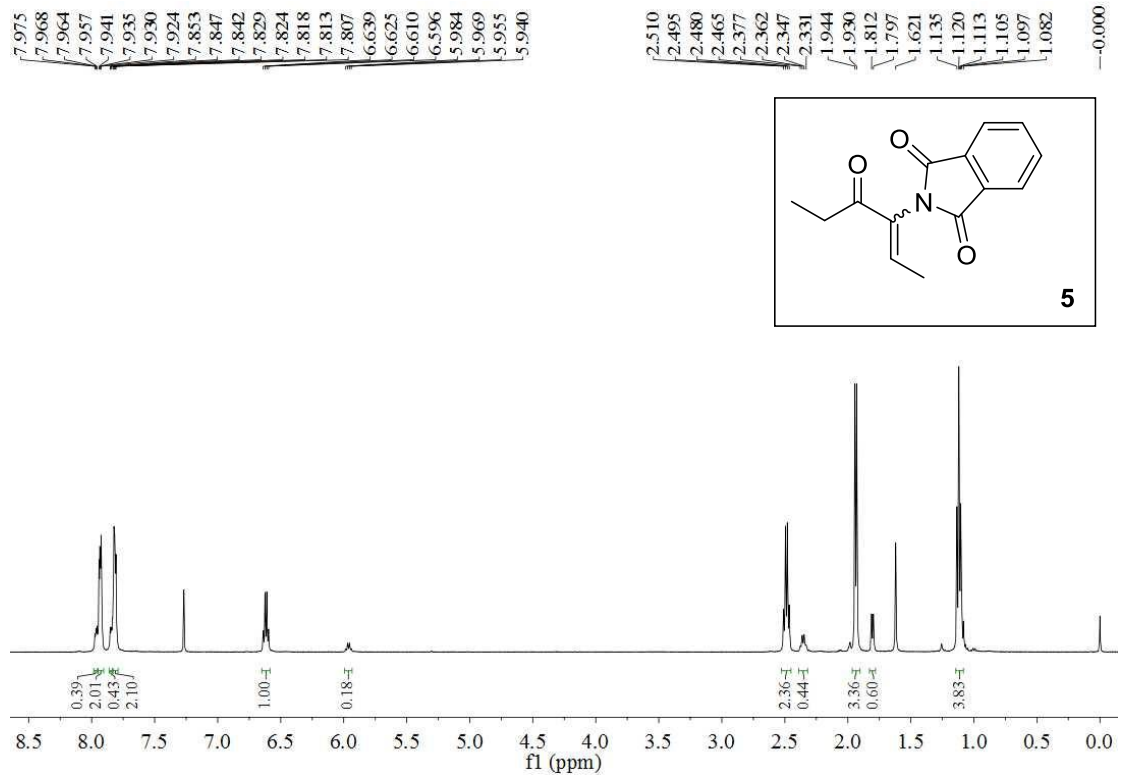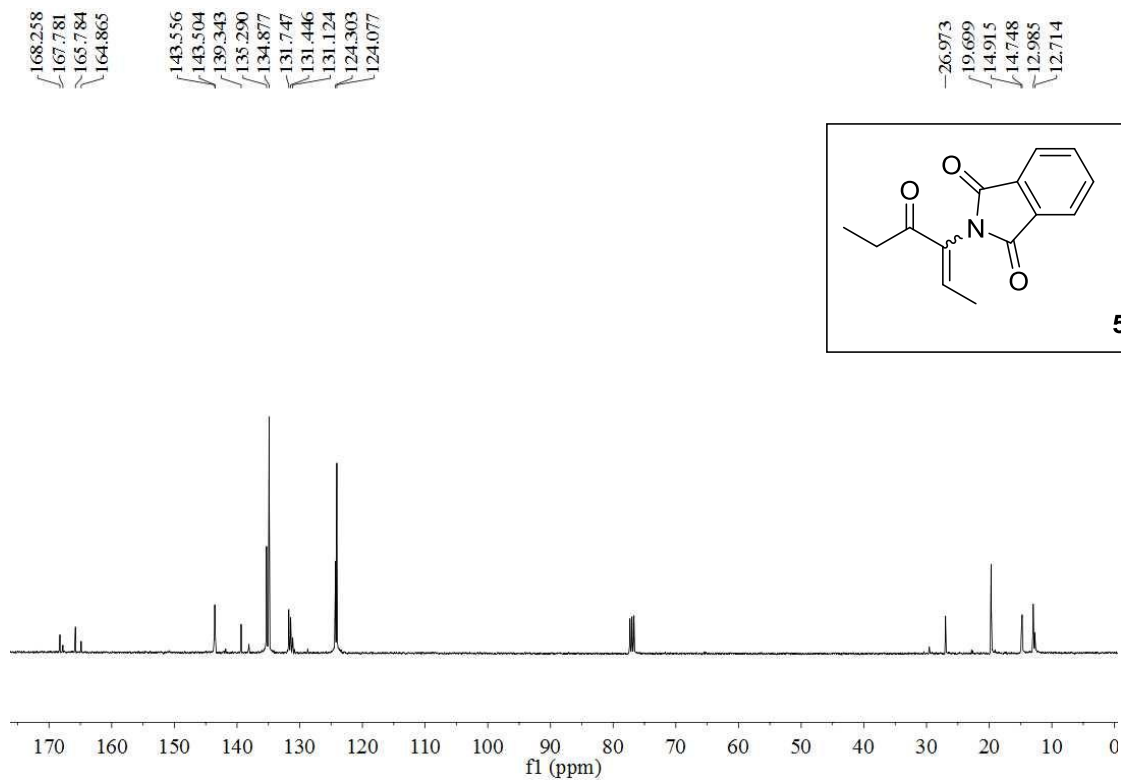

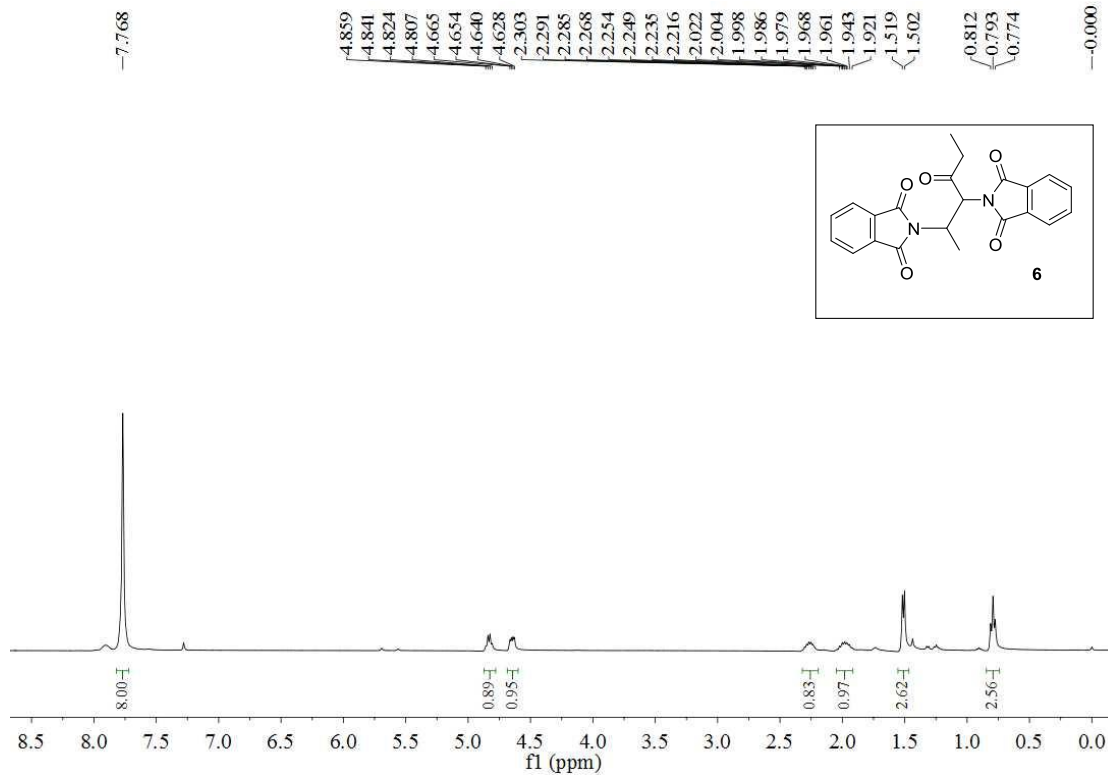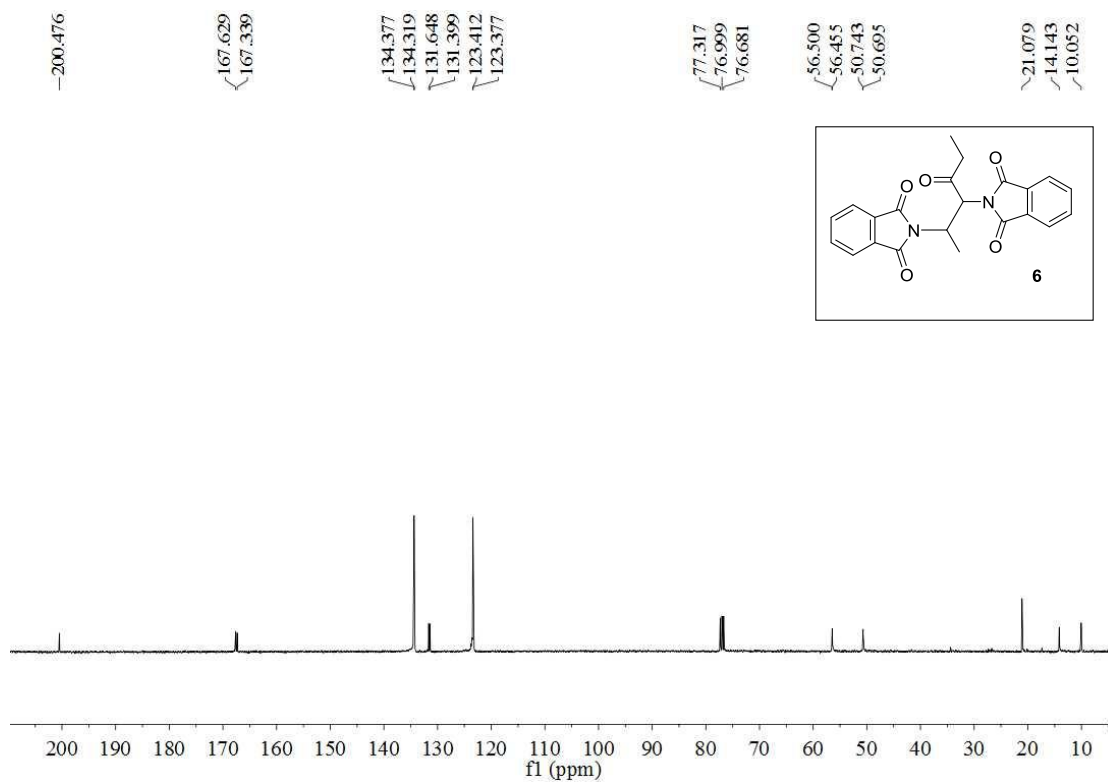



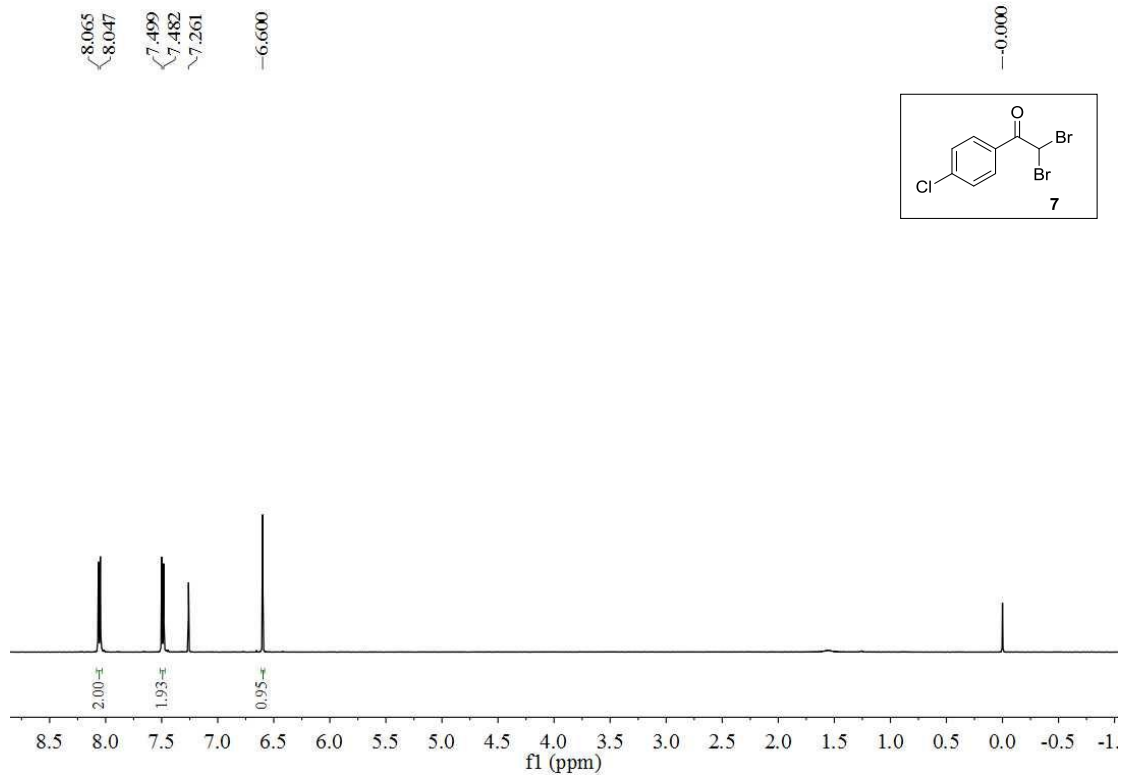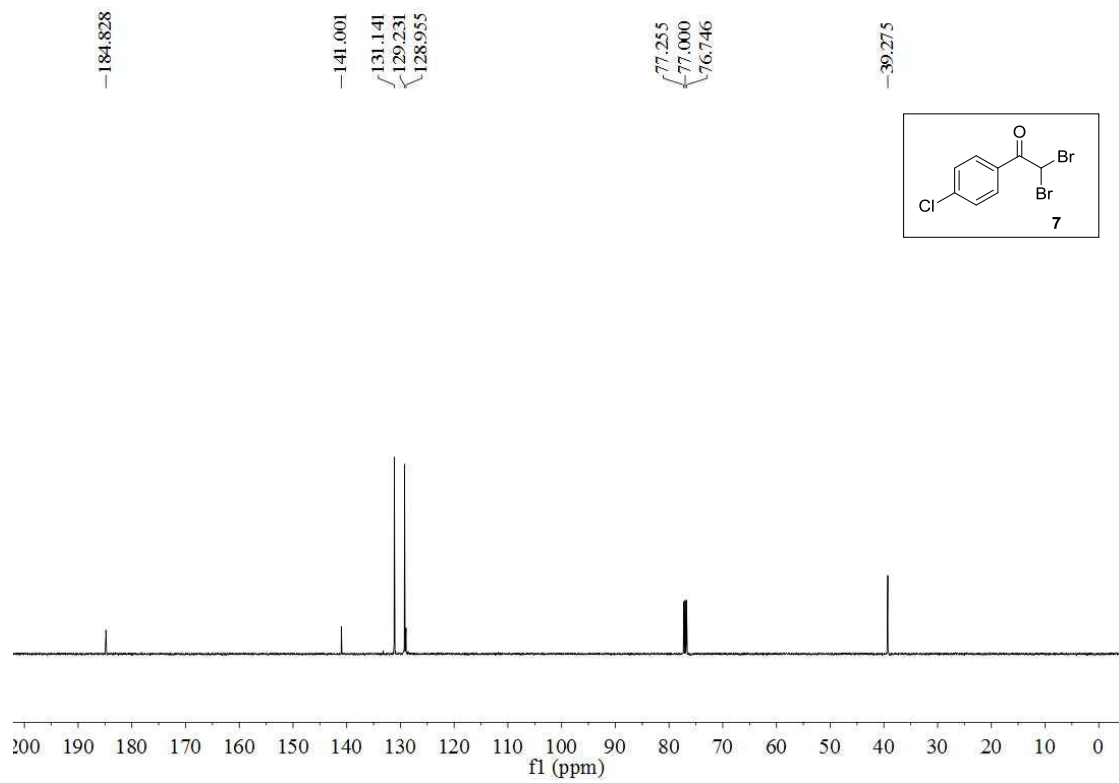

Supplement: c6ra12770c1.pdf [file c6ra12770c1.pdf]
